# Supplementary material for: Sugarcane Landraces of Ethiopia: Germplasm Collection and Analysis of Regional Diversity and Distribution
Source: Hindawi journal article supplement (doi:10.1155/2018/7920724), 2018-08-14
Supplement: f1 [file 7920724.f1.pdf]

## Electronic Supplementary Material

Title: Sugarcane landraces of Ethiopia: germplasm collection and analysis of regional diversity and distribution

Journal: Advances in Agriculture  
Hindawi Publishing Corporation

Authors: Esayas Tena Gashaw<sup>1\*</sup>, Firew Mekbib<sup>2</sup> and Amsalu Ayana<sup>3</sup>

<sup>1</sup>Ethiopian Sugar Corporation, Research and Development, Eastern Shewa Zone, P.O.Box15, Wonji, Ethiopia  
E-mail:esutena11@gmail.com

<sup>2</sup>Haramaya University, College of Agriculture and Environmental Sciences, School of Plant Sciences, P.O.Box 138, DireDawa,  
Ethiopia, E-mail:firew.mekbib@gmail.com

<sup>3</sup>Integrated Seed Sector Development Ethiopia Program, Addis Ababa, Ethiopia, E-mail: aga.amsaluayana@gmail.com

\*Corresponding author: Email: esutena11@gmail.com; Ethiopian Sugar Corporation, Research and Development; Eastern Shewa  
Zone, P.O.Box15, Wonji, Ethiopia ; Tel. +251 911 678943; Fax. +251 222200144

Supplemental Table 1. Passport data of sugarcane germplasm collected

| No. | Vernacular name                | Collector   | Region/Zone/Wereda/Kebele/Village       | Latitude/Longitude        | Altitude (m) | Growth stage during sampling           | Juice (° Brix%) |
|-----|--------------------------------|-------------|-----------------------------------------|---------------------------|--------------|----------------------------------------|-----------------|
| 1   | Nach Shenkora                  | Esayas Tena | SNNP/Gurage/Absege/Nachakulit/Misreta   | 08° 20.989'/37° 33.954'   | 1521         | 4 <sup>th</sup> ratoon/8-10 month old  | 17.50           |
| 2   | Bicha Shenkora                 | Esayas Tena | SNNP/Gurage/Absege/Nachakulit/Misreta   | 08° 20.989'/37° 33.954'   | 1521         | 4 <sup>th</sup> ratoon/8-10 month old  | 15.93           |
| 3   | Weliso                         | Esayas Tena | SNNP/Gurage/Absege/Nachakulit/Misreta   | 08° 20.989'/37° 33.954'   | 1521         | 4 <sup>th</sup> ratoon/8-10 month old  | 16.00           |
| 4   | Ye Gurage Shenkora             | Esayas Tena | SNNP/Gurage/Absege/Jejeba               | 11° 22.501'/ 036° 34.435' | 1200         | Plant cane 12 month old                | 18.00           |
| 5   | Kay Shenkora                   | Esayas Tena | SNNP/Gurage/Meskanena                   | 08° 20.989'/37° 33.954'   | 1521         | 3 <sup>rd</sup> ratoon/8 month old     | 13.00           |
| 6   | Kay Shenkora                   | Esayas Tena | SNNP/Gurage/Meskan/Enseno               | 8° 3.799/ 38° 28.447'     | 1846         | Plant cane 11 month old                | 17.50           |
| 7   | Andegna Dereja Canada Shenkora | Esayas Tena | SNNP/Silttie/Silttie/Balokeriso         | 07° 58.907'/038° 22.558'  | 1824         | Plant cane 4 month old                 | -               |
| 8   | Abesha Shenkora                | Esayas Tena | SNNP/Silttie/Silttie/Abzana             | 7° 46.905/38° 7.024'      | 2040         | Plant cane 9 month old                 | 16.30           |
| 9   | Tikur Shenkora                 | Esayas Tena | SNNP/Silttie/Werabe/01 Kebele           | 7° 54.415/38° 13.781'     | 2228         | 2 <sup>nd</sup> ratoon 7 month old     | 15.40           |
| 10  | Ye abesha Shenkora             | Esayas Tena | SNNP/Gamogofa/Bonke/GeresseZala         | 05° 54.307'/037° 18.54'   | 2258         | 3-4 <sup>th</sup> ratoon/7-8 month old | 18.00           |
| 11  | Bicha Shenkora                 | Esayas Tena | SNNP/Gamogofa/Bonke/GeresseZala/Tsophi  | 05° 54.476'/037° 18.38'   | 2133         | Plant cane 12 month old                | 15.17           |
| 12  | Kay Sidancho                   | Esayas Tena | SNNP/Sidama/Borecha/Yloubancho/Agoyicho | 06° 56.060'/038° 22.793'  | 2042         | 4 <sup>th</sup> ratoon/9 month old     | 13.00           |
| 13  | Kay Shenkora                   | Esayas Tena | SNNP/Gamogofa/Bonke/GeresseZala/Tsophi  | 05° 54.476'/037° 18.38'   | 2133         | Plant cane 12 month old                | 18.00           |
| 14  | Nach Shenkora                  | Esayas Tena | SNNP/Gamogofa/Bonke/Tsophi              | 6° 25.469'/37° 16.267'    | 1048         | Plant cane 12 month old                | 19.50           |
| 15  | Gamo                           | Esayas Tena | SNNP/Gamogofa/Chencha/Kogo              | 6° 11.71'/37° 33.571'     | 2376         | 2 <sup>nd</sup> ratoon 10 month old    | 17.00           |
| 16  | Gulisa                         | Esayas Tena | SNNP/Gamogofa/Chencha/Gule              | 6° 13.021'/37° 37.196'    | 1988         | 2 <sup>nd</sup> ratoon 9 month old     | 15.60           |
| 17  | Kay Shenkora                   | Esayas Tena | SNNP/Silttie/Silttie/Balokeriso         | 07° 58.907'/038° 22.558'  | 1824         | Plant cane 12 month old                | 16.83           |
| 18  | Canada Shenkora                | Esayas Tena | SNNP/Silttie/Silttie/Balokeriso         | 07° 58.907'/038° 22.558'  | 1824         | Plant cane 12 month old                | 16.00           |
| 19  | Burabure Shenkora              | Esayas Tena | SNNP/Gurage/Absege/Nachakulit/Misreta   | 08° 20.989'/37° 33.954'   | 1521         | 2 <sup>nd</sup> ratoon/8-10 month old  | 11.33           |
| 20  | Kay Shenkora                   | Esayas Tena | SNNP/Gurage/Absege/Jejeba/Jejeba        | 08° 16.298'/037° 43.384'  | 1808         | 4 <sup>th</sup> ratoon/3-4month old    | 5.00            |
| 21  | Yegurage Shenkora              | Esayas Tena | SNNP/Gurage/Absege/Jejeba/Jejeba        | 08° 16.298'/037° 43.384'  | 1808         | 4 <sup>th</sup> ratoon/3-4month old    | 8.00            |
| 22  | Yejima Shenkora                | Esayas Tena | SNNP/Gurage/Absege/Jejeba/Jejeba        | 08° 16.298'/037° 43.384'  | 1808         | 4 <sup>th</sup> ratoon/3-4month old    | 5.00            |
| 23  | Kay Shenkora                   | Esayas Tena | SNNP/Silttie/Werabe/02 Kebele           | 07° 49.933'/038° 10.793'  | 2101         | Plant cane 12 month old                | 17.00           |
| 24  | Ye Abesha Shenkora             | Esayas Tena | SNNP/South Omo/Debub Ari/Mester/Jagame  | 05° 59.202/036° 35.037'   | 1705         | 2 <sup>nd</sup> ratoon/7 month old     | 18.67           |
| 25  | Nach Shenkora                  | Esayas Tena | SNNP/South Omo/Debub Ari/Mester/Jagame  | 05° 59.202/036° 35.037'   | 1705         | 2 <sup>nd</sup> ratoon/7 month old     | 18.00           |
| 26  | Wolesh                         | Esayas Tena | SNNP/South Omo/Debub Ari/Bazet/Ekzek    | 05° 47. 213'/036° 34.900' | 1436         | 50th ratoon 12 month old               | 14.67           |
| 27  | Wolesh                         | Esayas Tena | SNNP/South Omo/Debub Ari/Bazet/Ekzek    | 05° 47. 213'/036° 34.900' | 1436         | 50th ratoon 12 month old               | 15.50           |

Supplemental Table 1 continued

|    |                        |             |                                                                      |                           |      |                                        |       |
|----|------------------------|-------------|----------------------------------------------------------------------|---------------------------|------|----------------------------------------|-------|
| 28 | Tinkish                | Esayas Tena | SNNP/South Omo/Debub Ari/Bazet/Ekzek                                 | 05° 47. 213'/036° 34.900' | 1436 | 50th ratoon 12 month old               | 15.00 |
| 29 | Wonji                  | Esayas Tena | SNNP/Gamogofa/Bonke/GeresseZala/                                     | 05° 54.307'/037° 18.54'   | 2258 | Taken from market                      |       |
| 30 | Nach (Arenguade) Ageda | Esayas Tena | SNNP/Konso Special Wereda/GasergeKebele                              | 05° 96.038'/037° 21.194'  | 1727 | 4 <sup>th</sup> ratoon 10 month old    | 17.37 |
| 31 | Burabure Shenkora      | Esayas Tena | SNNP/Konso Special Wereda/BussoKebele                                | 05° 18.495'/037° 25.28'   | 1357 | > 10 years 12 month old                | 15.67 |
| 32 | Wonji                  | Esayas Tena | SNNP/South Omo/Debub Ari/Bazet/Ekzek                                 | 05° 47. 213'/036° 34.900' | 1436 | 4 <sup>th</sup> ratoon/6 month old     | 13.00 |
| 33 | Wolshi                 | Esayas Tena | SNNP/South Omo/Debub Ari/Metser                                      |                           |      | Taken from market                      |       |
| 34 | Wonji                  | Esayas Tena | SNNP/South Omo/Selamago/Aomoronbemo                                  | 5° 36.959'/36° 29.465'    | 1059 | 3 <sup>rd</sup> ratoon 8 month old     | 14.70 |
| 35 | Tinkish                | Esayas Tena | SNNP/South Omo/Selamago/Narmashiki                                   | 5° 39.419'/36° 32.432'    | 1403 | Plant cane 14 month old                | 16.00 |
| 36 | American               | Esayas Tena | SNNP/Sidama/Borecha/Yloubancho/Agoyicho                              | 06° 55.908'/038° 22.793'  | 2059 | 3-4 <sup>th</sup> ratoon/7-8 month old |       |
| 37 | Jambo                  | Esayas Tena | SNNP/Sidama/Borecha/Yloubancho/Agoyicho                              | 06° 56.060'/038° 22.793'  | 2042 | 3rd ratoon/9 month old                 | 15.00 |
| 38 | Nach Sidancho          | Esayas Tena | SNNP/Sidama/Borecha/Yloubancho/Agoyicho                              | 06° 56.060'/038° 22.793'  | 2042 | 4 <sup>th</sup> ratoon/8-9 month old   | 16.00 |
| 39 | Bicha Shenkora         | Esayas Tena | SNNP/Sidama/Borecha/AldadaDela                                       | 6° 55.258'/38° 18.065'    | 1951 | Plant cane 13 month old                | 19.00 |
| 40 | Engliz                 | Esayas Tena | SNNP/Sidama/Wondogenet/ShashaKakalo                                  | 6° 32.837'/38° 25.481'    | 2070 | Plant cane 12 month old                | 18.60 |
| 41 | Nach Shenkora          | Esayas Tena | SNNP/Sidama/Wondogenet/WeshaSoyama                                   | 6° 32.674'/38° 29.436'    | 2600 | Plant cane 16 month old                | 17.80 |
| 42 | Azaro                  | Esayas Tena | SNNP/Amaro Special Wereda/ Jijolakebele/Kore village/Cheffa district | 05° 40.446'/037° 55.669'  | 1410 | 2 <sup>nd</sup> ratoon/7 month old     | 17.17 |
| 43 | Kollo                  | Esayas Tena | SNNP/Amaro Special Wereda/ Jijolakebele/Kore village/Cheffa district | 05° 40.446'/037° 55.669'  | 1410 | 2 <sup>nd</sup> ratoon/7 month old     | 16.00 |
| 44 | Wonji                  | Esayas Tena | SNNP/Amaro special Wereda/ Jijolakebele/Kore village/Cheffa district | 05° 40.446'/037° 55.669'  | 1410 | 2 <sup>nd</sup> ratoon/7 month old     | 15.50 |
| 45 | Moris                  | Esayas Tena | SNNP/Amaro special Wereda/ Korebiko                                  | 5° 39.583'/37° 36.537'    | 1499 | Plant cane 12 month old                | 19.00 |
| 46 | Kembata                | Esayas Tena | SNNP/Gedeo/Wenago/Deko                                               | 06° 16.889'/038° 12.919'  | 1914 | >20 years 1 12 month old               | 18.00 |
| 47 | Sidama Shenkora        | Esayas Tena | SNNP/Gedeo/Wenago/BeleBukisa                                         | 6° 17.444'/38° 16.088'    | 1811 | 2 <sup>nd</sup> ratoon 10 month old    | 16.80 |
| 48 | Bulisa                 | Esayas Tena | SNNP/Gedeo/Bule/Geledacho                                            | 6° 17.608'/38° 25.316'    | 2799 | 3 <sup>rd</sup> ratoon 10 month old    | 15.60 |
| 49 | Nach Shenkora          | Esayas Tena | SNNP/Gedeo/Bule/Basura                                               | 6° 16.133'/38° 23.998'    | 2788 | 4 <sup>th</sup> ratoon 11 month old    | 13.60 |
| 50 | Nach Shenkora          | Esayas Tena | SNNP/Amaro special Wereda/ Jijolakebele/Kore village/Cheffa district | 05° 40.446'/037° 55.669'  | 1410 | 2 <sup>nd</sup> ratoon/7 month old     | 18.00 |
| 51 | Andegna Dereja Wonji   | Esayas Tena | SNNP/Wolayta/Damotgale/Gacheno                                       | 07° 02.280'/037° 55.072'  | 1882 | plant cane 1-2 month old               |       |
| 52 | Sidama                 | Esayas Tena | SNNP/Amaro special Wereda/ Jijolakebele/Kore village/Cheffa district | 05° 40.446'/037° 55.669'  | 1410 | 2 <sup>nd</sup> ratoon/7 month old     | 17.60 |
| 53 | Yegamo Shenkora        | Esayas Tena | SNNP/Amaro special Wereda/ Jijolakebele/Kore village/Cheffa district | 05° 40.446'/037° 55.669'  | 1410 | 2 <sup>nd</sup> ratoon/7 month old     | 17.00 |
| 54 | Moliso                 | Esayas Tena | SNNP/Konta Special Wereda/ Cheka Bochakebele/Bocha village           | 07° 05.953'/036° 39.495'  | 1996 | plant cane 7-8 month old               |       |

Supplemental Table 1 continued

|    |                    |             |                                                               |                          |      |                                      |       |
|----|--------------------|-------------|---------------------------------------------------------------|--------------------------|------|--------------------------------------|-------|
| 55 | Nach Shenkora      | Esayas Tena | SNNP/Konta Special Wereda/ Cheka Bochakebele                  | 07° 06.244'/036° 40.164' | 2105 | 5 <sup>th</sup> ratoon 8 month old   | 17.60 |
| 56 | Tazma              | Esayas Tena | SNNP/Konta Special Wereda/ Cheka<br>Bochakebele/Bocha village | 07° 05.953'/036° 39.495' | 1996 | 4-5 th ratoon 8 months old           | 12.50 |
| 57 | Burabure Shenkora  | Esayas Tena | SNNP/Konta Special Wereda/ Cheka<br>Bochakebele/Bocha village | 07° 05.953'/036° 39.495' | 1996 | 4-5 th ratoon 8 months old           | 14.50 |
| 58 | Jimma              | Esayas Tena | SNNP/Konta Special Wereda/GenjiShasho                         | 7° 6.054'/36° 46.439'    | 1775 | 2 <sup>nd</sup> ratoon 9 month old   | 17.50 |
| 59 | Wolayta            | Esayas Tena | SNNP/Wolayta/Damotgale/Gacheno                                | 07° 02.280'/037° 55.072' | 1882 | 2 <sup>nd</sup> ratoon/8 month old   | 14.67 |
| 60 | Wolayta            | Esayas Tena | SNNP/Wolayta/Damotgale/Buge                                   | 7° 6.381'/37° 55.488'    | 1903 | Plant cane10 month old               | 17.80 |
| 61 | Kay Shenkora       | Esayas Tena | SNNP/Wolayta/DamotWoyide/Oloba                                | 6° 49.696'/37° 42.964'   | 1856 | 2 <sup>nd</sup> ratoon 7 month old   | 14.60 |
| 62 | Nach Shenkora      | Esayas Tena | SNNP/Wolayta/DamotWoyide/Kinido Koyo                          | 6° 50.023'/37° 40.327'   | 1898 | Plant cane10 month old               | 16.00 |
| 63 | Kay Shenkora       | Esayas Tena | SNNP/Dawro/Loma/Wushay                                        | 07° 00.612'/037° 12.285' | 2163 | 2 <sup>nd</sup> ratoon/5 month old   | 10.27 |
| 64 | Kenya              | Esayas Tena | SNNP/Dawro/Loma/GesaChere                                     | 6° 57.385'/37° 16.761'   | 1357 | Plant cane10 month old               | 18.70 |
| 65 | Wetet              | Esayas Tena | SNNP/Dawro/Mareka/Batokolbo                                   | 7° 0.493'/37° 10.829'    | 2131 | 3 <sup>rd</sup> ratoon 6 month old   | 12.00 |
| 66 | Kay Shenkora       | Esayas Tena | SNNP/Konta Special Wereda/ Cheka<br>Bochakebele/Bocha         | 07° 05.953'/036° 39.495' | 1996 | Plant cane 7-8 month old             | 10.10 |
| 67 | Atena Moris        | Esayas Tena | SSNP/KembataTembaro/KachaBira/Mesena                          | 07° 10.944'/037° 46.746' | 1838 | 2 <sup>nd</sup> ratoon/8 month old   | 12.93 |
| 68 | Bshe               | Esayas Tena | SSNP/KembataTembaro/Timbaro/Gaecha                            | 7° 21.421'/37° 51.039'   | 2276 | 2 <sup>nd</sup> ratoon 8 month old   | 16.00 |
| 69 | Kembata            | Esayas Tena | SSNP/KembataTembaro/Timbaro/Beda                              | 7° 23.546'/37° 50.215'   | 2205 | Plant cane12 month old               | 18.50 |
| 70 | Dolche             | Esayas Tena | SNNP/Wolayta/Damotgale/Gacheno                                | 07° 02.280'/037° 55.072' | 1882 | Plant cane 18 month old              | 15.83 |
| 71 | Kay Ageda Shenkora | Esayas Tena | SNNP/Halabakulito Special Wereda/Alemtena                     | 07° 22.433'/038° 06.433' | 1797 | Plantcane 12 month old               | 12.17 |
| 72 | Moris              | Esayas Tena | SNNP/Halabakulito Special Wereda/Alemtena                     | 07° 22.433'/038° 06.433' | 1797 | 3 <sup>rd</sup> ratoon/12 month old  | 20.17 |
| 73 | Bolfe              | Esayas Tena | SSNP/KembataTembaro/KachaBira/Mesena                          | 07° 10.944'/037° 46.746' | 1838 | Plant cane 12 month old              | 15.67 |
| 74 | Abesha             | Esayas Tena | SSNP/KembataTembaro/KachaBira/Mesena                          | 07° 10.944'/037° 46.746' | 1838 | 2 <sup>nd</sup> ratoon/12 month old  | 16.33 |
| 75 | Wotete             | Esayas Tena | SSNP/KembataTembaro/KachaBira/Mesena                          | 07° 10.944'/037° 46.746' | 1838 | Plant cane 10 month old              | 14.33 |
| 76 | Tazma/Burabure     | Esayas Tena | SNNP/Dawro/Mareka/MedaKuli/Gendomeda                          | 06° 58.977'/037° 11.493' | 1803 | 4 <sup>th</sup> ratoon/10 month old  | 17.33 |
| 77 | BetamNach Shenkora | Esayas Tena | SNNP/Konta Special Wereda/ Cheka Bochakebele                  | 07° 06.244'/036° 40.164' | 2105 | 5 <sup>th</sup> ratoon 7-8 month old | 14.00 |
| 78 | Wonji-1            | Esayas Tena | SSNP/KembataTembaro/ KachaBira/Wonko                          | 07° 12.316'/037° 50.843' | 1952 | 2 <sup>nd</sup> ratoon/6-7 month old | 14.87 |
| 79 | Bishoftu           | Esayas Tena | SSNP/KembataTembaro/ KachaBira/Wonko                          | 07° 12.316'/037° 50.843' | 1952 | 2 <sup>nd</sup> ratoon/6-7 month old | 16.67 |
| 80 | Wotet              | Esayas Tena | SNNP/Wolayta/Damotgale/ Gacheno                               | 07° 02.280'/037° 55.072' | 1882 | Plant cane 18 month old              | 14.43 |
| 81 | Wotete             | Esayas Tena | SNNP/Halabakulito Special Wereda/ Bedene                      | 07° 22.637'/038° 06.278' | 1798 | 2 <sup>nd</sup> ratoon/6-7 month old | 14.97 |
| 82 | Yeferenj Shenkora  | Esayas Tena | SNNP/Dawro/Mareka/MedaKuli/ Gendomeda                         | 06° 58.977'/037° 11.493' | 1803 | 5 <sup>th</sup> ratoon 12 month old  | 18.67 |

Supplemental Table 1 continued

|     |                                          |             |                                                |                          |        |                                        |       |
|-----|------------------------------------------|-------------|------------------------------------------------|--------------------------|--------|----------------------------------------|-------|
| 83  | Bula Shenkora                            | Esayas Tena | SNNP/Sheka/Masha/Shibo                         | 07° 44.641'/035° 28.511' | 2277   | 2 <sup>nd</sup> ratoon/10-12 month old | 17.43 |
| 84  | Bicha Shenkora                           | Esayas Tena | SNNP/Sheka/Masha/Beto                          | 07° 44.641'/035° 28.511' | 2277   | Plantcane 12 month old                 | 17.00 |
| 85  | Tikur Ageda                              | Esayas Tena | SNNP/Sheka/Yeki/Addisbirhan                    | 07° 11.212'/035° 26.095' | 1164   | 2 <sup>nd</sup> ratoon/10-12 month old | 16.27 |
| 86  | Ye Kenya Ageda                           | Esayas Tena | SNNP/Sheka/Masha/Keja                          | 07° 50.149'/035° 28.159' | 1827   | Plantcane 8 month old                  | 12.17 |
| 87  | Kay Ageda                                | Esayas Tena | SNNP/Sheka/Yeki/Addisbirhan                    | 07° 11.212'/035° 26.095' | 1164   | 2 <sup>nd</sup> ratoon/10-12 month old | 15.50 |
| 88  | Tepi                                     | Esayas Tena | SNNP/Sheka/Yeki/Fide                           | 7° 14.556'/35° 29.645'   | 1350   | 3 <sup>rd</sup> ratoon 10 month old    | 14.60 |
| 89  | Ye Kenya Shenkora                        | Esayas Tena | SNNP/Sheka/Masha/Masha 01                      | 07° 44.641'/035° 28.511' | 2277   | taken from market                      |       |
| 90  | Kay Ageda                                | Esayas Tena | SNNP/Kefa/Gimbo/Bonga 01                       | 07° 15.225'/036° 15.303' | 1792   | Plantcane 9 month old                  | 15.00 |
| 91  | Shembeko Ageda                           | Esayas Tena | SNNP/Kefa/Gimbo/Bonga 01                       | 07° 15.225'/036° 15.303' | 1792   | 2 <sup>nd</sup> ratoon/7 month old     | 16.37 |
| 92  | Bicha Shenkora                           | Esayas Tena | SNNP/Kefa/Gimbo/Baka                           | 7° 2.292'/36° 55.503'    | 1372   | Plant cane 12 month old                | 17.80 |
| 93  | Kaficho                                  | Esayas Tena | SNNP/Kefa/Cheta/Aja                            | 6° 23.831'/36° 44.297'   | 1152   | 2 <sup>nd</sup> ratoon 9 month old     | 17.50 |
| 94  | Nach Shenkora                            | Esayas Tena | SNNP/Kefa/Cheta/Kolla                          | 6° 16.297'/36° 43.638'   | 1965   | Plant cane 13 month old                | 15.90 |
| 95  | Tikur Ageda                              | Esayas Tena | SNNP/ Bench Majii /MizanTeferi/ Hibretkebele   | 07° 00.061'/035° 35.802' | 1356   | 10 <sup>th</sup> ratoon/12 month old   | 20.00 |
| 96  | Nach Ageda                               | Esayas Tena | SNNP/ Bench Majii /MizanTeferi/ 06 kebele      | 6° 55.586'/35° 35.083'   | 2067   | 2 <sup>nd</sup> ratoon 9 month old     | 15.00 |
| 97  | Tepi                                     | Esayas Tena | SNNP/ Bench Majii /Maji /Haro                  | 6° 10.399'/35° 35.742'   | 2345   | 5 <sup>th</sup> ratoon 8 month old     | 15.80 |
| 98  | Bicha Shenkora                           | Esayas Tena | SNNP/ Bench Majii /Maji /Adikas                | 5° 59.912'/35° 36.072'   | 1046   | 3 <sup>rd</sup> ratoon 10 month old    | 16.00 |
| 99  | Huleteгна Dereja Jambo Kay               | Esayas Tena | Oromia/West Arsi/Wondo/Shesha kebele           | 07° 05.662'/038° 36.203' | 1705   | Plant cane 18 months old               | 16.00 |
| 100 | Andegna Dereja Jambo Kay                 | Esayas Tena | Oromia/West Arsi/Wondo/Shesha kebele           | 07° 05.662'/038° 36.203' | 1705   | Plant cane 18 months old               | 14.77 |
| 101 | Sostegna Dereja Jambo Kay/Metfo Shenkora | Esayas Tena | Oromia/West Arsi/Wondo/Shesha kebele           | 07° 05.662'/038° 36.203' | 1705   | Plant cane 18 months old               | 17.50 |
| 102 | Yemaytafit Shenkora                      | Esayas Tena | Oromia/Bale/Agarfa/Wabe                        |                          |        | taken from market                      |       |
| 103 | Kay Shenkora                             | Esayas Tena | Oromia/Arsi/Tena/Kereyuharzuna/ Debenshe       | 07° 42.648'/039° 35.844' | 1848   | Plantcane 14 month old                 | 19.93 |
| 104 | Wotete                                   | Esayas Tena | Oromia/Arsi/Tio/Bosha                          |                          | market | Plantcane 12-14 month old              | 17.33 |
| 105 | Shenkora Dima/Kay Shenkora               | Esayas Tena | Oromia/Bale/Agarfa/Alochefo/                   | 07° 23.154'/039° 46.271' | 1497   | > 60 years 7-8 month old               | 16.67 |
| 106 | Nach Shenkora/Shenkora Adi               | Esayas Tena | Oromia/Arsi/Tena/Kereyuharzuna/Debenshe        | 07° 42.648'/039° 35.844' | 1848   | Plantcane 14 month old                 | 21.30 |
| 107 | Nach Shenkora                            | Esayas Tena | Oromia/Bale/Agarfa/Alochefo/ Odachefo          | 07° 23.154'/039° 46.271' | 1497   | > 60 years 4-5 month old               | 15.43 |
| 108 | Moris                                    | Esayas Tena | Oromia/Arsi/Tena/Kereyuharzuna/ Debenshe       | 07° 42.648'/039° 35.844' | 1848   | Plantcane 12 month old                 | 16.73 |
| 109 | Kay Shenkora                             | Esayas Tena | Oromia/Bale/Goro/Melkabuta/ Gadula Gola Dhertu | 06° 58.539'/040° 35.398' | 1611   | Plantcane 12 month old                 | 18.67 |
| 110 | Ye Abesha Shenkora                       | Esayas Tena | Oromia/West Shewa/Ambo/ Harutiro               | 09° 07.613'/037° 47.724' | 2370   | 2 <sup>nd</sup> ratoon/1 year old      | 15.03 |

Supplemental Table 1 continued

|     |                            |             |                                                  |                                                  |      |                                               |       |
|-----|----------------------------|-------------|--------------------------------------------------|--------------------------------------------------|------|-----------------------------------------------|-------|
| 111 | Ye Oromo Shenkora          | Esayas Tena | Oromia/West Shewa/Ambo/ Harutiro                 | 09 <sup>o</sup> 07.613'/037 <sup>o</sup> 47.724' | 2370 | 2 <sup>nd</sup> ratoon/1 year old             | 15.00 |
| 112 | Ye Bako Shenkora           | Esayas Tena | Oromia/West Shewa/Ambo/ Harutiro                 | 09 <sup>o</sup> 07.613'/037 <sup>o</sup> 47.724' | 2370 | 2 <sup>nd</sup> ratoon/1 year and 6 month old | 18.60 |
| 113 | Shenkora Dima/Kay Shenkora | Esayas Tena | Oromia/Illubabor/Bure/Wengawobe                  | 08 <sup>o</sup> 09.189'/035 <sup>o</sup> 27.382' | 1758 | Plantcane 8 month old                         | 14.00 |
| 114 | Kay Shenkora Ageda         | Esayas Tena | Oromia/Illubabor/Huka/Abyuadrere                 | 08 <sup>o</sup> 13.781'/035 <sup>o</sup> 15.796' | 1600 | Plantcane 12 month old                        | 12.93 |
| 115 | Kay Shenkora/ Dima         | Esayas Tena | Oromia/Jima Zone/ Sekoru Wereda/Habedode Kebele  |                                                  |      | Taken from market                             |       |
| 116 | Tikur Ageda                | Esayas Tena | Oromia/Illubabor/Bilonopa/Suli                   | 08 <sup>o</sup> 26.252'/035 <sup>o</sup> 36.267' | 1417 | 2 <sup>nd</sup> ratoon/9 month old            | 14.53 |
| 117 | Nach Shenkora              | Esayas Tena | Oromia/Illubabor/Bilonopa/Dizy                   | 08 <sup>o</sup> 23.138'/035 <sup>o</sup> 36.249' | 1559 | 2 <sup>nd</sup> ratoon/11 month old           | 17.40 |
| 118 | Nach Shenkora              | Esayas Tena | Oromia/Illubabor/Dureni/                         | 08 <sup>o</sup> 29.860'/035 <sup>o</sup> 45.110' | 1754 | 10th ratoon/5-6 month old                     | 11.75 |
| 119 | Dalecha Shenkora           | Esayas Tena | Oromia/Illubabor/Bilonopa/Suli                   | 08 <sup>o</sup> 26.252'/035 <sup>o</sup> 36.267' | 1417 | 2 <sup>nd</sup> ratoon/9 month old            | 12.60 |
| 120 | Ye Abesha Shenkora         | Esayas Tena | Oromia/Jimma/Agaro/Kesohiti                      | 07 <sup>o</sup> 51.305'/036 <sup>o</sup> 38.997' | 1579 | 4 <sup>th</sup> ratoon/8 month old            | 10.97 |
| 121 | Kay Shenkora Ageda         | Esayas Tena | Oromia/Illubabor/Bilonopa/Suli                   | 08 <sup>o</sup> 26.252'/035 <sup>o</sup> 36.267' | 1417 | 2 <sup>nd</sup> ratoon/9 month old            | 15.33 |
| 122 | Kay Shenkora               | Esayas Tena | Oromia/Illubabor/Dureni/ Betelegebecha/Hadere    | 08 <sup>o</sup> 29.860'/035 <sup>o</sup> 45.110' | 1754 | 10th ratoon/8 month old                       | 13.70 |
| 123 | Barbados                   | Esayas Tena | Oromia/Gimbi/Laloasabe/Harochserdo Kebele        |                                                  |      | Taken from market                             |       |
| 124 | Ye Bako Shenkora           | Esayas Tena | Oromia/Gimbi/Laloasabe/Dengoro 01/Golbe          | 09 <sup>o</sup> 16.130'/035 <sup>o</sup> 40.804' | 1730 | 2 <sup>nd</sup> ratoon/12 month old           | 14.90 |
| 125 | Kay Shenkora               | Esayas Tena | Oromia/Gimbi/Laloasabe/Dengoro 01/Golbe          | 09 <sup>o</sup> 16.130'/035 <sup>o</sup> 40.804' | 1730 | Plantcane 8 month old                         | 15.4  |
| 126 | Ageda Adi                  | Esayas Tena | Oromia/Kelem Welega/Sayo/ Gelanometi/Sembo       | 08 <sup>o</sup> 32.704'/034 <sup>o</sup> 43.594' | 1730 | 2-3 ratoon/12 month old                       | 13.67 |
| 127 | Dalecha Shenkora           | Esayas Tena | Oromia/Kelem Welega/Dale Wabera/Chanka Burore    | 08 <sup>o</sup> 49.268'/035 <sup>o</sup> 03.747' | 1470 | 2 <sup>nd</sup> ratoon/6-7 month old          | 16.37 |
| 128 | Nach Shenkora              | Esayas Tena | Oromia/Gimbi/Laloasabe/ Dengoro 01/Golbe         | 09 <sup>o</sup> 16.130'/035 <sup>o</sup> 40.804' | 1730 | 2 <sup>nd</sup> ratoon/12 month old           | 15.93 |
| 129 | Tabor Shenkora             | Esayas Tena | Oromia/Gimbi/Guliso/Wereseyo/ Kobera             | 09 <sup>o</sup> 10.256'/035 <sup>o</sup> 31.592' | 1484 | 3 <sup>rd</sup> ratoon/12 month old           | 17.97 |
| 130 | Shilmu                     | Esayas Tena | Oromia/Kelem Welega/Dale Wabera/Chanka Burore    | 08 <sup>o</sup> 49.268'/035 <sup>o</sup> 03.747' | 1470 | 2 <sup>nd</sup> ratoon/6-7 month old          | 13.27 |
| 131 | Nach Shenkora              | Esayas Tena | Oromia/Kelem Welega/Hawagelan/ Haromechara       | 08 <sup>o</sup> 43.544'/034 <sup>o</sup> 59.141' | 1444 | Plantcane 12-13 month old                     | 16.50 |
| 132 | Kay Shenkora               | Esayas Tena | Oromia/West Shewa/Bakotibe/ Dembigobu            | 09 <sup>o</sup> 07.616'/037 <sup>o</sup> 04.565' | 1620 | 2 <sup>nd</sup> ratoon/8 month old            | 14.80 |
| 133 | Buli                       | Esayas Tena | Oromia/Kelem Welega/Dale Wabera/Chanka           | 08 <sup>o</sup> 51.507'/035 <sup>o</sup> 04.122' | 1487 | 2 <sup>nd</sup> ratoon/6-7 month old          | 12.67 |
| 134 | Nach Ageda                 | Esayas Tena | Oromia/Kelem Welega/Hawagelan/Haromechara        | 08 <sup>o</sup> 43.544'/034 <sup>o</sup> 59.141' | 1444 | 3 <sup>rd</sup> ratoon 12 month old           | 20.73 |
| 135 | Abesha Shenkora            | Esayas Tena | Oromia/West Shewa/Bakotibe/Dembigobu             | 09 <sup>o</sup> 07.616'/037 <sup>o</sup> 04.565' | 1620 | 2 <sup>nd</sup> ratoon/8 month old            | 17.87 |
| 136 | Shenkora Adi               | Esayas Tena | Oromia/West Shewa/Bakotibe/Dembigobu             | 09 <sup>o</sup> 07.616'/037 <sup>o</sup> 04.565' | 1620 | 2 <sup>nd</sup> ratoon/8 month old            | 16.00 |
| 137 | Nach Shenkora              | Esayas Tena | Oromia/East Hararghe/Gurawa/01 Kebele/Kera Sefer | 09 <sup>o</sup> 08.392'/041 <sup>o</sup> 50.424' | 2401 | 11 year ratoon 9 month old                    | 17.90 |
| 138 | Shenkora Adi               | Esayas Tena | Oromia/East Hararghe/Kurfachele/Dawe/            | 09 <sup>o</sup> 17.423'/041 <sup>o</sup> 52.611' | 1713 | 3 <sup>rd</sup> ratoon/6 month old            | 14.50 |

## Supplemental Table 1 continued

|     |                         |             |                                                                   |                          |      |                                     |       |
|-----|-------------------------|-------------|-------------------------------------------------------------------|--------------------------|------|-------------------------------------|-------|
| 139 | Nach Shenkora           | Esayas Tena | Oromia/East Hararghe/Meta/Chelenko 02 kebele                      | 09° 23.875'/041° 33.670' | 2179 | 4 <sup>th</sup> ratoon/9 month old  | 15.07 |
| 140 | Shenkora Dima           | Esayas Tena | Oromia/East Hararghe/Kurfachele/Dawe/                             | 09° 17.423'/041° 52.611' | 1713 | Taken from market                   |       |
| 141 | Nach Shenkora/Wonji     | Esayas Tena | Oromia/East Hararghe/Meta/Chelenko 02 kebele                      | 09° 23.875'/041° 33.670' | 2179 | 4 <sup>th</sup> ratoon/9 month old  | 17.70 |
| 142 | Yemilat Nach Shenkora   | Esayas Tena | Oromia/East Hararghe/Meta/Chelenko 02 kebele                      | 09° 23.875'/041° 33.670' | 2179 | 4 <sup>th</sup> ratoon/9 month old  | 20.50 |
| 143 | Kay Shenkora            | Esayas Tena | Oromia/East Hararghe/Babile/Ereguda/Megida                        | 09° 14.783'/042° 15.022' | 1315 | 2 <sup>nd</sup> ratoon/6 month old  | 12.34 |
| 144 | Nach Shenkora           | Esayas Tena | Oromia/East Hararghe/Babile/Ereguda/Megida                        | 09° 14.783'/042° 15.022' | 1315 | 3 <sup>rd</sup> ratoon/7 month old  | 13.34 |
| 145 | Kay Shenkora/Burabure   | Esayas Tena | Oromia/East Hararghe/Babile/Ereguda/Megida                        | 09° 14.783'/042° 15.022' | 1315 | 2 <sup>nd</sup> ratoon/6 month old  | 12.48 |
| 146 | Kay Shenkora            | Esayas Tena | Oromia/East Hararghe/Kombolcha/Sibilu/Gende Wedo Usman            | 09° 25.248'/042° 06.965' | 2113 | Plant cane/6 month old              | 13.84 |
| 147 | Kay Shenkora/Burabure   | Esayas Tena | Oromia/East Hararghe/Gorogutu/Erermedanchine                      | 09° 24.966'/041° 29.590' | 1728 | 6 <sup>th</sup> ratoon 6 month old  | 16.83 |
| 148 | Guracha Shenkora/Tikur  | Esayas Tena | Oromia/East Hararghe/Babile/Ereguda/Megida                        | 09° 14.783'/042° 15.022' | 1315 | 2 <sup>nd</sup> ratoon/9 month old  | 13.56 |
| 149 | Misrah                  | Esayas Tena | Oromia/West Hararghe/Gemechis/Wemecho Dayo/Dekadabu               | 08° 45.408'/040° 53.285' | 1496 | 2 <sup>nd</sup> ratoon/10 month old | 16.57 |
| 150 | Wonji                   | Esayas Tena | Oromia/West Hararghe/Gemechis/Wemecho Dayo/Dekadabu               | 08° 45.408'/040° 53.285' | 1496 | 2 <sup>nd</sup> ratoon/6 month old  | 15.40 |
| 151 | Wonji/Bula/Shenkora Adi | Esayas Tena | Oromia/West Hararghe/Gubakoricha/<br>Oda Aneni 05 kebele/Nanofaro | 08° 56.717'/040° 33.308' | 1972 | Plantcane 12 month old              | 15.03 |
| 152 | Shekole                 | Esayas Tena | Oromia/West Hararghe/Gubakoricha/<br>Oda Aneni 05 kebele/Nanofaro | 08° 56.717'/040° 33.308' | 1972 | 6 <sup>th</sup> ratoon 9 month old  | 13.90 |
| 153 | Holland                 | Esayas Tena | Oromia/West Hararghe/Darolebu                                     | 08° 36.352'/040° 19.278' | 1751 | 3 <sup>rd</sup> ratoon/6 month old  | 15.37 |
| 154 | Bure                    | Esayas Tena | Oromia/West Hararghe/Gubakoricha/<br>Oda Aneni 05 kebele/Nanofaro | 08° 56.717'/040° 33.308' | 1972 | Plantcane 8 month old               | 13.47 |
| 155 | Shenkora Dima           | Esayas Tena | Oromia/West Hararghe/Mesela/Lubudekeb/Deneba                      | 09° 05.913'/041° 08.151' | 1647 | 2 <sup>nd</sup> ratoon/12 month old | 14.90 |
| 156 | Wonji                   | Esayas Tena | Oromia/West Hararghe/Mesela/Lubudekeb/Deneba                      | 09° 05.913'/041° 08.151' | 1647 | 2 <sup>nd</sup> ratoon/12 month old | 16.03 |
| 157 | Gende Lega              | Esayas Tena | Oromia/West Hararghe/Gubakoricha/<br>Oda Aneni 05 kebele/Nanofaro | 08° 56.717'/040° 33.308' | 1972 | Plantcane 8 month old               | 15.40 |
| 158 | Dikala                  | Esayas Tena | Oromia/East Hararghe/Deder/Kiyo (Nedi Gelan Sedi)/Tulu            | 09° 15.638'/041° 23.451' | 1812 | 4 <sup>th</sup> ratoon/12 month old | 16.27 |
| 159 | Alaa                    | Esayas Tena | Oromia/East Hararghe/Deder/Kiyo                                   | 09° 15.638'/041° 23.451' | 1812 | Plantcane 12 month old              | 15.13 |
| 160 | Shenkora Adi            | Esayas Tena | Oromia/East Hararghe Zone/ Meta/ Ramis                            |                          |      | Bought at Kulubi market             |       |
| 161 | Aladi                   | Esayas Tena | Oromia/East Hararghe/Deder/Kiyo (Nedi Gelan Sedi)/Tulu            | 09° 15.638'/041° 23.451' | 1812 | 2 <sup>nd</sup> ratoon/6 month old  | 13.25 |

Supplemental Table 1 continued

|     |                                |             |                                                           |                           |      |                                        |       |
|-----|--------------------------------|-------------|-----------------------------------------------------------|---------------------------|------|----------------------------------------|-------|
| 162 | Erero                          | Esayas Tena | Oromia/East Hararghe/Deder/Kiyo (Nedi Gelan Sedi)/Tulu    | 09° 15.638'/041° 23.451'  | 1812 | Plant cane 9 month old                 | 15.84 |
| 163 | Engda                          | Esayas Tena | Oromia/West Hararghe/Anchar/Chorchora/Megala Deye Market  | 08° 47.508'/040° 17.063   | 1690 | 2 <sup>nd</sup> ratoon/8 month old     | 14.48 |
| 164 | Kay Shenkora                   | Esayas Tena | Oromia/West Hararghe/Anchar/Chorchora/ Megala Deye Market | 08° 47.508'/040° 17.063   | 1690 | 2 <sup>nd</sup> ratoon/12 month old    | 17.93 |
| 165 | NachShenkora/Shenkora Adi      | Esayas Tena | Oromia/Jimma/Agaro/Kesohiti                               | 07° 51.305'/ 036° 38.997' | 1579 | 10th ratoon/5-6 month old              | 11.75 |
| 166 | Kay Shenkora/Shenkora Dimma    | Esayas Tena | Oromia/Jimma/Agaro/Kesohiti                               | 07° 51.305'/ 036° 38.997' | 1579 | 10th ratoon/8 month old                | 13.70 |
| 167 | Kay Ageda/Shenkora Dimma       | Esayas Tena | Oromia/Gimbi/Laloasabe/Dengoro 01/Golbe                   | 09° 16.130'/ 035° 40.804' | 1730 | 3 <sup>rd</sup> ratoon/9 month old     | 16.87 |
| 168 | Arebia                         | Esayas Tena | Oromia/West Shewa/Bakotibe/ Dembigobu                     | 09° 07.616'/ 037° 04.565' | 1620 | 2 <sup>nd</sup> ratoon/8 month old     | 14.65 |
| 169 | Dikala                         | Esayas Tena | Oromia/West Shewa/Bakotibe/ Dembigobu                     | 09° 07.616'/ 037° 04.565' | 1620 | 2 <sup>nd</sup> ratoon/8 month old     | 15.00 |
| 170 | Ageda Adi                      | Esayas Tena | Oromia/Borena/Yabelo                                      | 4° 53.543' / 38° 06.654'  | 1856 | 2 <sup>nd</sup> ratoon/8 month old     | 15.45 |
| 171 | Shenkora Guracha               | Esayas Tena | Oromia/Borena/Yabelo                                      | 4° 53.543' / 38° 06.654'  | 1856 | 2 <sup>nd</sup> ratoon/8 month old     | 14.51 |
| 172 | Kay Shenkora/Wonji             | Esayas Tena | Amhara/North Shewa/Debresina                              | 10° 04.978'/039° 53.606'  | 1276 | taken from market                      |       |
| 173 | Nach Shenkora                  | Esayas Tena | Amhara/North Shewa/Debresina                              | 10° 04.978'/039° 53.606'  | 1276 | taken from market                      |       |
| 174 | Tikur Ageda                    | Esayas Tena | Amhara/North Shewa/Kewet/Yelen                            | 10° 04.978'/039° 53.606'  | 1235 | Plantcane 8 month old                  | 16.73 |
| 175 | Nach Ageda                     | Esayas Tena | Amhara/North Shewa/Kewet/Yelen                            | 10° 04.978'/039° 53.606'  | 1235 | Plantcane 8 month old                  | 14.70 |
| 176 | Nach Kechacha Shenkora         | Esayas Tena | Amhara/North Shewa/Kewet/Yelen                            | 10° 04.978'/039° 53.606'  | 1235 | 3 <sup>rd</sup> ratoon/8 month old     | 16.00 |
| 177 | Getr                           | Esayas Tena | Amhara/North Shewa/Kewet/Yelen                            | 10° 04.978'/039° 53.606'  | 1235 | 3 <sup>rd</sup> ratoon/8 month old     | 14.00 |
| 178 | Nach Shenkora                  | Esayas Tena | Amhara/Debub Gondar/Derra/ Mashenkoro/Misgano             | 11° 42.976'/037° 36.908   | 1993 | Plantcane 10 month old                 | 14.93 |
| 179 | Yeferenj Shenkora              | Esayas Tena | Amhara/Debub Gondar/Fogera/ Wereta                        | 11° 55.550'/037° 41.751'  | 1820 | Taken from market                      |       |
| 180 | Mogn Aybelash                  | Esayas Tena | Amhara/Debub Gondar/Fogera/ Wereta                        | 11° 55.550'/037° 41.751'  | 1820 | Taken from market                      |       |
| 181 | Kay Shenkora/Shilmlim/Burabure | Esayas Tena | Amhara/Debub Gondar/Fogera/ Wereta                        | 11° 55.550'/037° 41.751'  | 1820 | Taken from market                      |       |
| 182 | Yegojam Shenkora               | Esayas Tena | Amhara/Debub Gondar/Fogera/Wagtera                        | 11° 54.574'/037° 33.371'  | 1797 | 7th ratoon/12 month old                | 13.83 |
| 183 | Tikur Shenkora                 | Esayas Tena | Amhara/West Gojam/Bahirdar Zuria/ Tis Abay/Gebere Mahiber | 11° 29.128'/037° 34.331'  | 1642 | 3 <sup>rd</sup> ratoon/10 month old    | 22.57 |
| 184 | Yeferenj Shenkora/Mogn Aybela  | Esayas Tena | Amhara/West Gojam/Bahirdar Zuria/ Tis Abay/Gebere Mahiber | 11° 29.128'/037° 34.331'  | 1642 | Plantcane 11 month old                 | 16.87 |
| 185 | Shilmlm Sora                   | Esayas Tena | Amhara/West Gojam/Bahirdar Zuria/ Tis Abay/Gebere Mahiber | 11° 29.128'/037° 34.331'  | 1642 | Plantcane 11 month old                 | 14.20 |
| 186 | Ye Bure Shenkora               | Esayas Tena | Amhara/West Gojam/Bahirdar Zuria/ Tis Abay/Gebere Mahiber | 11° 29.128'/037° 34.331'  | 1642 | 3 <sup>rd</sup> ratoon/11-12 month old | 21.03 |



## Supplemental Table 1 continued

|     |                         |             |                                                          |                          |      |                                               |       |
|-----|-------------------------|-------------|----------------------------------------------------------|--------------------------|------|-----------------------------------------------|-------|
| 187 | Nach Ageda              | Esayas Tena | Amhara/West Gojam/Jabitehnan/<br>Mankusa Abdegom/Endalah | 10° 41.075'/037° 11.357' | 1941 | 2 <sup>nd</sup> ratoon/1 year and 6 month old | 20.43 |
| 188 | Tikur Shenkora          | Esayas Tena | Amhara/West Gojam/Jabitehnan/<br>Mankusa Abdegom/Endalah | 10° 41.075'/037° 11.357' | 1941 | 2 <sup>nd</sup> ratoon/1 year and 6 month old | 21.63 |
| 189 | Nach Shenkora           | Esayas Tena | Amhara/West Gojam/Debub Achefer/<br>Lalibela/Azena       | 11° 28.590'/036° 57.027' | 1883 | 3 <sup>rd</sup> ratoon/8 month old            | 16.33 |
| 190 | Sendel                  | Esayas Tena | Amhara/West Gojam/Debub Achefer/<br>Lalibela/Azena       | 11° 28.590'/036° 57.027' | 1883 | 3 <sup>rd</sup> ratoon/8 month old            | 16.33 |
| 191 | Nach Yemailat Shenkora  | Esayas Tena | Amhara/West Gojam/Debub Achefer/<br>Lalibela/Azena       | 11° 28.590'/036° 57.027' | 1883 | 4 <sup>th</sup> ratoon/8 month old            | 20.33 |
| 192 | Bule                    | Esayas Tena | Amhara/West Gojam/Debub Achefer/<br>Lalibela/Azena       | 11° 28.590'/036° 57.027' | 1883 | 4 <sup>th</sup> ratoon/8 month old            | 15.93 |
| 193 | Kay Shenkora            | Esayas Tena | Amhara/West Gojam/Debub Achefer/<br>Lalibela/Azena       | 11° 28.590'/036° 57.027' | 1883 | 4 <sup>th</sup> ratoon/8 month old            | 20.50 |
| 194 | Nach Shenkora           | Esayas Tena | Amhara/West Gojam/Debub Achefer/<br>Lalibela/Azena       | 11° 28.590'/036° 57.027' | 1883 | 3 <sup>rd</sup> ratoon/8 month old            | 16.00 |
| 195 | Kay Shenkora            | Esayas Tena | Amhara/Awi/Guangua/Mota/ Menta Wuha                      | 10° 50.310'/036° 20.642' | 1532 | 2 <sup>nd</sup> ratoon/6-7 month old          | 16.83 |
| 196 | Tikur Shenkora          | Esayas Tena | Amhara/Awi/Guangua/Mota/ Menta Wuha                      | 10° 50.310'/036° 20.642' | 1532 | 2 <sup>nd</sup> ratoon/6-7 month old          | 19.10 |
| 197 | Nach Shenkora           | Esayas Tena | Amhara/Awi/Guangua/Mota/ Menta Wuha                      | 10° 50.310'/036° 20.642' | 1532 | 2 <sup>nd</sup> ratoon/6-7 month old          | 16.77 |
| 198 | Nach Shenkora           | Esayas Tena | Amhara/East Gojam/Dejen/Kurar/ Dengel                    | 10° 06.578'/038° 09.202' | 1820 | Plantcane 10 month old                        | 16.27 |
| 199 | Bishoftu                | Esayas Tena | Amhara/East Gojam/Dejen/Kurar/ Dengel                    | 10° 06.578'/038° 09.202' | 1820 | Plantcane 10 month old                        | 15.00 |
| 200 | China                   | Esayas Tena | Amhara/East Gojam/Dejen/Kurar/ Ambayamit                 | 10° 06.490'/038° 09.185' | 1804 | 26th ratoon 5 month old                       | 13.00 |
| 201 | Gojame/Ye Gojam Ageda   | Esayas Tena | Amhara/East Gojam/Dejen/Kurar/ Ambayamit                 | 10° 06.490'/038° 09.185' | 1804 | 26th ratoon 5 month old                       | 13.50 |
| 202 | Nach Shenkora           | Esayas Tena | Amhara/East Gojam/Dejen/Kurar/ Dengel                    | 10° 06.578'/038° 09.202' | 1820 | 2 <sup>nd</sup> ratoon/7 month old            | 16.10 |
| 203 | Kay Shenkora            | Esayas Tena | Amhara/East Gojam/Basoliben/ Yejube                      | 10° 06.490'/037° 09.185' | 1800 | Taken from market                             |       |
| 204 | Abadir                  | Esayas Tena | Amhara/East Gojam/Dejen/Kurar/ Ambayamit                 | 10° 06.490'/038° 09.185' | 1804 | 2 <sup>nd</sup> ratoon/12 month old           | 13.50 |
| 205 | Ye Fincha Shenkora      | Esayas Tena | Amhara/East Gojam/Basoliben/ Entemen Dejat               | 10° 03.504'/037° 50.264' | 2360 | Plant cane 1 year and 2 month                 | 20.33 |
| 206 | Kay Ageda               | Esayas Tena | Amhara/East Gojam/Dejen/Dejen Town                       |                          |      | Taken from Dejen market                       |       |
| 207 | Kay Ageda               | Esayas Tena | Amhara/East Gojam/Dejen/Yibeza Michael                   |                          |      | Taken from Dejen market                       |       |
| 208 | Bicha Shenkora          | Esayas Tena | Amhara/East Gojam/Dejen/Kurar/ Dengel                    | 10° 06.578'/038° 09.202' | 1820 | 3 <sup>rd</sup> ratoon/9 month old            | 21.60 |
| 209 | Nach Ageda/ Shenkora    | Esayas Tena | Amhara/Semen Welo/Gubalafto/ Woynye<br>011/Medakit       | 11° 53.630'/039° 28.136' | 2030 | 4 <sup>th</sup> ratoon/1 year and 4 month old | 21.03 |
| 210 | Kay Ageda/ Shenkora     | Esayas Tena | Amhara/Semen Welo/Gubalafto/<br>Woynye 011/Medakit       | 11° 53.630'/039° 28.136' | 2030 | 4 <sup>th</sup> ratoon/1 year and 4 month old | 17.87 |
| 211 | Kay Shenkora (Burabure) | Esayas Tena | Amhara/Semen Welo/Habru/09 kebele/ Ante                  | 11° 41.085'/039° 38.325' | 1695 | Plantcane 6 month old                         | 17.33 |

## Supplemental Table 1 continued

|     |                          |             |                                                                  |                           |      |                                               |       |
|-----|--------------------------|-------------|------------------------------------------------------------------|---------------------------|------|-----------------------------------------------|-------|
| 212 | Nach Ye Abesha Shenkora  | Esayas Tena | Amhara/Semen Welo/Habru/09 kebele/ Ante                          | 11° 41.085'/039° 38.325'  | 1695 | 7 <sup>th</sup> ratoon 5 month old            | 17.70 |
| 213 | Kay Shenkora             | Esayas Tena | Amhara/Debub Welo/Werebabo/02 kebele/Bulbulo/Aselel Prim. School | 11° 19.354'/039° 45.074'  | 2072 | 2 <sup>nd</sup> ratoon/10--12 month old       | 13.93 |
| 214 | Tikur Ageda              | Esayas Tena | Amhara/Semen Welo/Habru/Mersa Town                               |                           |      | Taken from market                             |       |
| 215 | Nach Tilik Shenkora      | Esayas Tena | Amhara/Debub Welo/Werebabo/02 kebele/Bulbulo/Aselel Prim. School | 11° 19.354'/039° 45.074'  | 2072 | 5 <sup>th</sup> ratoon 12 month old           | 18.23 |
| 216 | Nach Shenkora            | Esayas Tena | Amhara/ Oromia special Zone/Kemissie/02 kebele/Ergi              | 10° 42.491'/039° 51.712'  | 1422 | 5 <sup>th</sup> ratoon 5-6 month old          | 18.10 |
| 217 | Nach Shenkora            | Esayas Tena | Amhara/ Oromia special Zone/Kemissie/02 kebele/Ergi              | 10° 42.491'/039° 51.712'  | 1422 | 5 <sup>th</sup> ratoon 5-6 month old          | 19.90 |
| 218 | Nach Ageda               | Esayas Tena | Amhara/Debub Welo/Borena/04 kebele/ Jimaye                       | 10° 45.172'/038° 45.974'  | 2687 | Taken from market                             |       |
| 219 | Nach Tinish Shenkora     | Esayas Tena | Amhara/Debub Welo/Werebabo/02 kebele/Bulbulo/Aselel Prim. School | 11° 19.354'/039° 45.074'  | 2072 | 2 <sup>nd</sup> ratoon/10--12 month old       | 18.34 |
| 220 | Ye Beskula Shenkora      | Esayas Tena | Amhara Region/South Welo Zone/ Legambo Wereda/Beskula Kebele     |                           |      | Taken from market                             |       |
| 221 | Kay Shenkora             | Esayas Tena | Amhara/ Oromia special Zone/Kemissie/02 kebele/Ergi              | 10° 42.491'/039° 51.712'  | 1422 | 5 <sup>th</sup> ratoon 5-6 month old          | 21.13 |
| 222 | Nach Ye Abesha Shenkora  | Esayas Tena | Amhara/Semen Welo/Meket/013 kebele/ Emamoz Fikrte Kirstos Gedam  |                           |      | Brought by monks from the monastery           |       |
| 223 | Nach Ageda/ Shenkora     | Esayas Tena | Amhara/Waghmra/Sekota/02 kebele/ Tiya                            | 12° 30.391'/039° 05.795'  | 1978 | 2 <sup>nd</sup> ratoon/5 month old            | 15.87 |
| 224 | Burabure Shenkora Ageda  | Esayas Tena | Amhara/Semen Gondar/Gonder Zuria/ Enfranz                        | 12° 15.220'/037° 38.5191' | 1899 | 4 <sup>th</sup> ratoon/6 month old            | 13.76 |
| 225 | Kay Shenkora             | Esayas Tena | Amhara/West Gojam/Bahirdar Zuria/ Zenzelma                       |                           |      | Taken from market                             |       |
| 226 | Nach Shenkora            | Esayas Tena | BenshangulGumuz/Metekel/Pawe/Mender 24                           | 11° 22.501'/036° 34.435'  | 1197 | 2 <sup>nd</sup> ratoon/7 month old            | 14.36 |
| 227 | Bale Mesmer Kay Shenkora | Esayas Tena | BenshangulGumuz/Metekel/Pawe/Mender 24                           | 11° 22.501'/036° 34.435'  | 1197 | 3 <sup>rd</sup> ratoon/8-9 month old          | 17.20 |
| 228 | Nach Shenkora            | Esayas Tena | Amhara/East Gojam/Dejen/Dejen Town                               |                           |      | Taken from market                             |       |
| 229 | Kay Shenkora             | Esayas Tena | Amhara/East Gojam/Dejen/Dejen Town                               |                           |      | Taken from market                             |       |
| 230 | Kay Shenkora             | Esayas Tena | Amhara/East Gojam/Dejen/Kurar/Dengel                             | 10° 06.578'/038° 09.202'  | 1820 | 2 <sup>nd</sup> ratoon/1 year and 6 month old | 19.93 |
| 231 | Bishoftu                 | Esayas Tena | Amhara/East Gojam/Dejen/Kurar/Dengel                             | 10° 06.578'/038° 09.202'  | 1820 | 2 <sup>nd</sup> ratoon/1 year and 6 month old | 18.00 |
| 232 | Kay Ageda/Shenkora       | Esayas Tena | Amhara/Semen Welo/Habru/09 kebele/ Ante                          | 11° 41.088'/039° 38.328'  | 1690 | Taken from market                             |       |
| 233 | Nach Ageda/Shenkora      | Esayas Tena | Amhara/Semen Welo/Habru/09 kebele/ Ante                          | 11° 41.088'/039° 38.328'  | 1690 | Taken from market                             |       |
| 234 | Kay Ageda                | Esayas Tena | Tigray/Semen Mierab Tigray/Tach Koraro/ Semena/ Maymesreb        | 14° 11.602'/038° 20.897'  | 1927 | 2 <sup>nd</sup> ratoon/12 month old           | 16.60 |
| 235 | Kay Shenkora             | Esayas Tena | Tigray/Central Tigray/Tahtay Maychew/ Mayatsmi                   | 14° 04.680'/038° 33.366'  | 1993 | 2 <sup>nd</sup> ratoon/6 month old            | 23.27 |
| 236 | Kay Ageda                | Esayas Tena | Tigray/Semen Mierab Tigray/Tach Koraro/ Semena/ Maymesreb        | 14° 11.602'/038° 20.897'  | 1927 | 2 <sup>nd</sup> ratoon/12 month old           | 15.77 |
| 237 | Nach Shenkora            | Esayas Tena | Tigray/Central Tigray/Tahtay Maychew/Mayatsmi                    | 14° 04.680'/038° 33.366'  | 1993 | 2 <sup>nd</sup> ratoon/6 month old            | 11.50 |

---

Supplemental Table 1 continued

|     |                                |             |                                                |                                                   |      |                                      |       |
|-----|--------------------------------|-------------|------------------------------------------------|---------------------------------------------------|------|--------------------------------------|-------|
| 238 | Kay Ageda                      | Esayas Tena | Tigray/Semen Mierab Tigray/Tach Koraro/Semena  | 14 <sup>0</sup> 11.602'/038 <sup>0</sup> 20.897'  | 1927 | 2 <sup>nd</sup> ratoon/12 month old  | 16.23 |
| 239 | Kay Ageda/Shenkora             | Esayas Tena | Tigray/Debub Tigray/Ofla/Zata                  | 12 <sup>0</sup> 30.924'/039 <sup>0</sup> 16.477'  | 2134 | Plant cane 8 month old               | 16.47 |
| 240 | Ancha                          | Esayas Tena | Tigray/Debub Tigray/Ofla/Zata                  | 12 <sup>0</sup> 30.924'/039 <sup>0</sup> 16.477'  | 2134 | Plant cane 8 month old               | 15.37 |
| 241 | Ancha                          | Esayas Tena | Tigray/Debub Tigray/Ofla/Zata                  |                                                   |      | Taken from market                    |       |
| 242 | Nach Shenkora/Ye Jima Shenkora | Esayas Tena | Benshangulgumuz/Asosa/Bambasi Mender 49        | 09 <sup>0</sup> 49.520'/034 <sup>0</sup> 41.766'  | 1415 | Plantcane 7 month old                | 15.43 |
| 243 | Burabure Shenkora              | Esayas Tena | Benshangulgumuz/Asosa/Megele 32 (Sefera Tabia) | 10 <sup>0</sup> 01.179'/034 <sup>0</sup> 32.705'  | 1478 | 2 <sup>nd</sup> ratoon/7 month old   | 17.27 |
| 244 | Nach Shenkora                  | Esayas Tena | Benshangulgumuz/Asosa/Megele 32(Sefera Tabia)  | 10 <sup>0</sup> 01.179'/034 <sup>0</sup> 32.705'  | 1478 | 2 <sup>nd</sup> ratoon/7 month old   | 20.30 |
| 245 | Nach Shenkora                  | Esayas Tena | BenshangulGumuz/Metekel/Pawe/<br>Mender 28/29  | 11 <sup>0</sup> 16.526'/036 <sup>0</sup> 27.233'  | 1097 | 3 <sup>rd</sup> ratoon/8-9 month old | 17.87 |
| 246 | Kay Shenkora                   | Esayas Tena | BenshangulGumuz/Metekel/Pawe/<br>Mender 28/29  | 11 <sup>0</sup> 16.526'/036 <sup>0</sup> 27.233'  | 1097 | 3 <sup>rd</sup> ratoon/8-9 month old | 16.17 |
| 247 | Kay Shenkora                   | Esayas Tena | Benshangulgumuz/Asosa/ Megele 32(Sefera Tabia) | 10 <sup>0</sup> 01.179'/ 034 <sup>0</sup> 32.705' | 1478 | 2 <sup>nd</sup> ratoon/7 month old   | 18.80 |
| 248 | Ye Dengoro Shenkora            | Esayas Tena | Benshangulgumuz/Kemashe/Kemashe                | 09 <sup>0</sup> 30.200'/ 035 <sup>0</sup> 51.825' | 1343 | 2 <sup>nd</sup> ratoon/10 month old  | 16.45 |
| 249 | Nach Shenkora                  | Esayas Tena | BenshangulGumuz/Metekel/Pawe/Mender 24         | 11 <sup>0</sup> 22.501'/ 036 <sup>0</sup> 34.435' | 1197 | 2 <sup>nd</sup> ratoon/7 month old   | 14.36 |
| 250 | Bale Mesmer Kay Shenkora       | Esayas Tena | BenshangulGumuz/Metekel/Pawe/Mender 24         | 11 <sup>0</sup> 22.501'/ 036 <sup>0</sup> 34.435' | 1197 | 3 <sup>rd</sup> ratoon/8-9 month old | 17.20 |
| 251 | Nach Shenkora/Kadiken          | Esayas Tena | Gambella/Agnwak/Abobo/Aberimeti                | 07 <sup>0</sup> 55.825'/034 <sup>0</sup> 43.133'  | 507  | 2 <sup>nd</sup> ratoon/3 month old   | 12.40 |
| 252 | Shenkora                       | Esayas Tena | Gambella/Agnwak/Gog/Badabado                   | 07 <sup>0</sup> 38.955'/034 <sup>0</sup> 15.386'  | 454  | Taken from market                    |       |
| 253 | Burabure Shenkora              | Esayas Tena | Harari/Erer Wereda/Dodota Kebele/Mudir Village | 09 <sup>0</sup> 19.353'/042 <sup>0</sup> 13.030'  | 1376 | 2 <sup>nd</sup> ratoon/3 month old   | 12.70 |
| 254 | Kay Shenkora                   | Esayas Tena | Harari/Erer Wereda/Dodota Kebele/Mudir Village | 09 <sup>0</sup> 19.353'/042 <sup>0</sup> 13.030'  | 1376 | 2 <sup>nd</sup> ratoon/3 month old   | 15.60 |
| 255 | Bure                           | Esayas Tena | Somali/Shinele/Erer/Bila                       | 09 <sup>0</sup> 31.774'/041 <sup>0</sup> 24.965'  | 1192 | 3 <sup>rd</sup> ratoon/4 month old   | 12.00 |
| 256 | Bure                           | Esayas Tena | Somali/Shinele/Erer/ Gota                      |                                                   |      | Taken from market                    |       |
| 257 | Shenkora Dima                  | Esayas Tena | Somali/Shinele/Erer/Bila                       | 09 <sup>0</sup> 31.774'/041 <sup>0</sup> 24.965'  | 1192 | 4 <sup>th</sup> ratoon/8 month old   | 8.23  |

---

Supplemental Table 2. Information on sugarcane germplasm collected from different geographic regions in Ethiopia

| Regions/Zones          | Harvest age         |                 | No. of ratoons | No. of saleable Stalks per clump |        | Pest and disease situation                                                                                                                             |
|------------------------|---------------------|-----------------|----------------|----------------------------------|--------|--------------------------------------------------------------------------------------------------------------------------------------------------------|
|                        | Plant cane (Months) | Ratoon (Months) |                | Plant cane                       | Ratoon |                                                                                                                                                        |
|                        |                     |                 |                |                                  |        |                                                                                                                                                        |
| SNNPR/Gurage           | 12-14               | 9-10            | ~7             | 9-10                             | 17-20  | Termites and sometimes borer                                                                                                                           |
| SNNPR/Kembata– Tembaro | 12                  | 10-12           | ~6             | ~25                              | ~40    | Termites                                                                                                                                               |
| SNNPR/Sidama           | 15-16               | 13              | 6- 7           | 20-40                            | 40-70  | Disease called ‘Kewter’ in local language ‘Sidamigna’, a burning like symptom in the leaf margins was evident especially in the Nach Sidancho variety. |
| SNNPR/Gedio            | 12                  | 11              | 5              | ~10                              | ~20-30 | Termites                                                                                                                                               |
| SNNPR/Amaro            | 12                  | 6-7             | >10            | 10-15                            | 25-40  | Sometimes borer                                                                                                                                        |
| SNNPR/Wolayita         | 18                  | 12              | ~10            | ~35                              | ~50    | Jelly like fluid inside the leaf sheath during high fertility of the soil. No major insect or disease.                                                 |
| SNNPR/South Omo        | 12                  | 10              |                | ~7                               | ~10-15 | No major pest and disease except sometimes few borers observed.                                                                                        |
| SNNPR/Sheka            | 12                  | ~12             | ~5-10          | ~4-7                             | ~12-30 | Sometimes termites but they are easily controlled by application of ash to base of the clumps.                                                         |
| SNNPR/Keffa            | 12                  | 10              | 5-7            | ~4-7                             | 10-15  | No major pest and disease except sometimes few borers was observed.                                                                                    |
| SNNPR/Gamo Gofa        | 12                  | 10              | ~5             | 10-15                            | 30-60  | Sometimes borer                                                                                                                                        |
| SNNPR/Benchi – Maji    | 12- 18              | 10-12           | ~5             | 5                                | 10-15  | No major pest and disease except few borers                                                                                                            |
| SNNPR/Konso Special    | 12                  | 10              | >10            | ~5                               | ~9     | Mild attack from termite and borer sometimes                                                                                                           |
| SNNPR/Dawro            | 12                  | 7-8             | ~5             | ~20                              | ~40    | Sometimes borer                                                                                                                                        |

| Supplemental Table 2 continued |        |       |      |       |       |                                                                                                                                                           |
|--------------------------------|--------|-------|------|-------|-------|-----------------------------------------------------------------------------------------------------------------------------------------------------------|
| SNNPR/Konta Special<br>Wereda  | 12     | 6-8   | ~5   | 20-25 | 30-40 | No major disease and pest. But in one variety 'Tazma' kind of rust was observed marking the leaves starting from leaf tip and top of the plant downwards. |
| SNNPR/Silitie                  | 12     | 10-12 | ~5   | 5-7   | 9-13  | Sometimes borer and termites. Though mild, there was also a disease which dry the leaves and prevalent in ratoons crops which the farmers named 'Wag'     |
| SNNPR/Alaba Special<br>Wereda  | 12     | 12    | ~3   | ~25   | ~40   | Sometimes borer                                                                                                                                           |
| Oromiya/West Welega            | 12     | 12    | 7-15 | 15-20 | ~30   | Sometimes termites and rodents                                                                                                                            |
| Oromiya/East Welega            | 9      | 9     | 4    | 5-7   | 7-10  | Only sometimes borer                                                                                                                                      |
| Oromiya/Illubabor              | 12     | 8-9   | 5    | 5     | 12-15 | Only sometimes borer                                                                                                                                      |
| Oromiya/Jimma                  | 12     | 8-9   | 5    | 5     | 12-15 | Only sometimes borer                                                                                                                                      |
| Oromiya/West Shewa             | 9-10   | 8-9   | 4    | 5-6   | 7-10  | Only sometimes borer                                                                                                                                      |
| Oromiya/Arsi                   | 15-20  | 12-16 | 4-5  | 12-16 | 14-25 | Sometimes smut observed in some varieties like Moris when grown near swampy areas                                                                         |
| Oromiya/West<br>Harerge        | 12-16  | 7-12  | 7-10 | 10-20 | 20-30 | Sometimes borer and termites when there is shortage of irrigation water                                                                                   |
| Oromiya/East Harerge           | 12-24  | 7-12  | 7-10 | 20-30 | 40-50 | Sometimes termites and borer                                                                                                                              |
| Oromiya/Bale                   | 12- 18 | 6-12  | 6-8  | 3-5   | 10-12 | Sometimes borer, and there was also wild pig problem                                                                                                      |
| Oromiya/Borena                 | 12-16  | 7-9   | 7-10 | 5-9   | 15-20 | Sometimes termites and borer                                                                                                                              |
| Oromiya/Kelem                  | 12     | 8-9   | 7-9  | 15-20 | 25-30 | Sometimes borer                                                                                                                                           |
| Amhara/South Gondar            | 12-15  | 12    | 4-7  | 7-12  | 20-30 | Only sometimes mild attack from borers and termites occur                                                                                                 |

| Supplemental Table 2 continued            |       |      |       |       |       |                                                                                                                                                  |
|-------------------------------------------|-------|------|-------|-------|-------|--------------------------------------------------------------------------------------------------------------------------------------------------|
| Amhara/East Gojam                         | 12-24 | 8-12 | 3-6   | 10-20 | 20-30 | Only sometimes termites are a problem when the soil gets drier.                                                                                  |
| Amhara/Bahir Dar Zuria                    | 12    | 12   | 3-5   | 6-10  | 10-15 | No major disease and pest are reported                                                                                                           |
| Amhara/West Gojam and Awi                 | 16-18 | 12   | 2-3   | 10-15 | 18-20 | Sometimes borer and termites                                                                                                                     |
| Amhara/North Wollo                        | 15-18 | 14   | 7-10  | 15-20 | 25-30 | No major pests but sometimes borer and termites occur though not in economic threshold level.                                                    |
| Amhara/South Wollo                        | 24    | 12   | 7-10  | 20-25 | 30-40 | Sometimes borers and termites                                                                                                                    |
| Amhara/North Shewa                        | 8-10  | 8-10 | 9-10  | 8-19  | 15-20 | Sometimes borers and 'Jart'                                                                                                                      |
| Amhara/Waghmra                            | 12    | 8-9  | 7-8   | 5-6   | 15-20 | Sometimes termites during the dry season                                                                                                         |
| Tigray/South, Central and North West zone | 11-12 | 7-8  | 4-5   | 3-4   | 10-15 | Most of the time termites are a problem                                                                                                          |
| Benshangul-Gumz/Pawe                      | 12    | 7-9  | 4     | 5-7   | 22-28 | The major pest in Pawe area in general was termite. Borers were few and observed occasionally.                                                   |
| Benshangul-Gumz/Asosa                     | 12    | 7-8  | 7-8   | 10-20 | 12-25 | Sometimes borer and termites. To prevent the termites farmers use ash and also dug a ditch around the clump to prevent crossing of the termites. |
| Gambella/Mezhenger, Agnwak                | 12    | 8-10 | 5-7   | 2-3   | 10-15 | No major pests were reported but sometimes bore and termites were there though they were not economical pests.                                   |
| Somali/Shinele/Erer                       | 12    | 8    | 5-7   | 10-15 | 30-44 | No major pests and diseases were reported.                                                                                                       |
| Harari                                    | 9-10  | 7-8  | 13-15 | 8-10  | 16-20 | Sometimes bore and termites during dry season.                                                                                                   |

**Supplemental Table 3. Local sugarcane germplasm collected during 2010/11 and used for morphological diversity study**

| Code No. | Vernacular name                               | Region/Zone/Wereda/Kebele/Village        | Lat/Long                                          | Altitude (m) | Growth stage during sampling           | Brix % Juice |
|----------|-----------------------------------------------|------------------------------------------|---------------------------------------------------|--------------|----------------------------------------|--------------|
| 1        | Nach Shenkora                                 | SNNP/Gurage/Absege/Nachakulit/Misreta    | 08 <sup>0</sup> 20.989'/37 <sup>0</sup> 33.954'   | 1521         | 4th ratoon/8-10 month old              | 17.50        |
| 2        | Bicha Shenkora/Weliso                         | SNNP/Gurage/Absege/Nachakulit/Misreta    | 08 <sup>0</sup> 20.989'/37 <sup>0</sup> 33.954'   | 1521         | 4 <sup>th</sup> ratoon/8-10 month old  | 15.93        |
| 3        | Kay Shenkora                                  | SNNP/Gurage/Meskanena                    | 08 <sup>0</sup> 20.989'/37 <sup>0</sup> 33.954'   | 1521         | 3 <sup>rd</sup> ratoon/8 month old     | 13.00        |
| 4        | Andegna Dereja Canada Shenkora                | SNNP/Silttie/Silttie/Balokeriso          | 07 <sup>0</sup> 58.907'/038 <sup>0</sup> 22.558'  | 1824         | Plant cane 4 month old                 | -            |
| 5        | Ye abesha shenkora                            | SNNP/Gamogofa/Bonke/Geresse Zala         | 05 <sup>0</sup> 54.307'/037 <sup>0</sup> 18.54'   | 2258         | 3-4 <sup>th</sup> ratoon/7-8 month old | 18.00        |
| 6        | Bicha Shenkora                                | SNNP/Gamogofa/Bonke/Geresse Zala/Tsophi  | 05 <sup>0</sup> 54.476'/037 <sup>0</sup> 18.38'   | 2133         | Plant cane12 month old                 | 15.17        |
| 7        | Kay Sidancho                                  | SNNP/Sidama/Borecha/Yloubancho/Agoyicho  | 06 <sup>0</sup> 56.060'/038 <sup>0</sup> 22.793'  | 2042         | 4 <sup>th</sup> ratoon/9 month old     | 13.00        |
| 8        | Kay Shenkora                                  | SNNP/Gamogofa/Bonke/Geresse Zala/Tsophi  | 05 <sup>0</sup> 54.476'/037 <sup>0</sup> 18.38'   | 2133         | Plant cane12 month old                 | 18.00        |
| 9        | Kay Shenkora/Huleteгна dereja canada Shenkora | SNNP/Silttie/Silttie/Balokeriso          | 07 <sup>0</sup> 58.907'/038 <sup>0</sup> 22.558'  | 1824         | Plant cane12 month old                 | 16.83        |
| 10       | Burabure Shenkora                             | SNNP/Gurage/Absege/Nachakulit/Misreta    | 08 <sup>0</sup> 20.989'/37 <sup>0</sup> 33.954'   | 1521         | 2 <sup>nd</sup> ratoon/8-10 month old  | 11.33        |
| 11       | Kay Shenkora/Yegurage Shenkora                | SNNP/Gurage/Absege/Jejeba/Jejeba         | 08 <sup>0</sup> 16.298'/037 <sup>0</sup> 43.384'  | 1808         | 4 <sup>th</sup> ratoon/3-4month old    | 5.00         |
| 12       | Yejima Shenkora                               | SNNP/Gurage/Absege/Jejeba/Jejeba         | 08 <sup>0</sup> 16.298'/037 <sup>0</sup> 43.384'  | 1808         | 4 <sup>th</sup> ratoon/3-4month old    | 5.00         |
| 13       | Kay Shenkora                                  | SNNP/Silttie/Werabe/02 Kebele            | 07 <sup>0</sup> 49.933'/038 <sup>0</sup> 10.793'  | 2101         | Plant cane12 month old                 | 17.00        |
| 14       | Ye Abesha shenkora (Nach Shenkora)            | SNNP/South Omo/Deбub Ari/Mester/Jagame   | 05 <sup>0</sup> 59.202'/036 <sup>0</sup> 35.037'  | 1705         | 2 <sup>nd</sup> ratoon/7 month old     | 18.67        |
| 15       | Wolesh                                        | SNNP/South Omo/Deбub Ari/Bazet/Ekzek     | 05 <sup>0</sup> 47. 213'/036 <sup>0</sup> 34.900' | 1436         | 50th ratoon 12 month old               | 14.67        |
| 16       | Wolesh/Tinkish                                | SNNP/South Omo/Deбub Ari/Bazet/Ekzek     | 05 <sup>0</sup> 47. 213'/036 <sup>0</sup> 34.900' | 1436         | 50th ratoon 12 month old               | 15.50        |
| 17       | Wonji                                         | SNNP/Gamogofa/Bonke/Geresse Zala/        | 05 <sup>0</sup> 54.307'/037 <sup>0</sup> 18.54'   | 2258         | Taken from market                      |              |
| 18       | Nach (Arenguade) Ageda                        | SNNP/Konso Special Wereda/Gaserge Kebele | 05 <sup>0</sup> 96.038'/037 <sup>0</sup> 21.194'  | 1727         | 4 <sup>th</sup> ratoon 10 month old    | 17.37        |
| 19       | Burabure Shenkora                             | SNNP/Konso Special Wereda/Busso Kebele   | 05 <sup>0</sup> 18.495'/037 <sup>0</sup> 25.28'   | 1357         | > 10 years 12 month old                | 15.67        |
| 20       | Wonji                                         | SNNP/South Omo/Deбub Ari/Bazet/Ekzek     | 05 <sup>0</sup> 47. 213'/036 <sup>0</sup> 34.900' | 1436         | 4 <sup>th</sup> ratoon/6 month old     | 13.00        |
| 21       | Wolshi                                        | SNNP/South Omo/Deбub Ari/Metser          |                                                   |              | Taken from market                      |              |
| 22       | American                                      | SNNP/Sidama/Borecha/Yloubancho/Agoyicho  | 06 <sup>0</sup> 55.908'/038 <sup>0</sup> 22.793'  | 2059         | 3-4 <sup>th</sup> ratoon/7-8 month old |              |
| 23       | Jambo                                         | SNNP/Sidama/Borecha/Yloubancho/Agoyicho  | 06 <sup>0</sup> 56.060'/038 <sup>0</sup> 22.793'  | 2042         | 3rd ratoon/9 month old                 | 15.00        |
| 24       | Nach Sidancho                                 | SNNP/Sidama/Borecha/Yloubancho/Agoyicho  | 06 <sup>0</sup> 56.060'/038 <sup>0</sup> 22.793'  | 2042         | 4 <sup>th</sup> ratoon/8-9 month old   | 16.00        |

## Supplemental Table 3 continued

|    |                                          |                                                                       |                                                  |      |                                      |       |
|----|------------------------------------------|-----------------------------------------------------------------------|--------------------------------------------------|------|--------------------------------------|-------|
| 25 | Azaro, Kollo                             | SNNP/Amaro special Wereda/ Jijola kebele/Kore village/Cheffa district | 05 <sup>0</sup> 40.446'/037 <sup>0</sup> 55.669' | 1410 | 2 <sup>nd</sup> ratoon/7 month old   | 17.17 |
| 26 | Wonji                                    | SNNP/Amaro special Wereda/ Jijola kebele/Kore village/Cheffa district | 05 <sup>0</sup> 40.446'/037 <sup>0</sup> 55.669' | 1410 | 2 <sup>nd</sup> ratoon/7 month old   | 15.50 |
| 27 | Kembata                                  | SNNP/Gedeo/Wenago/Deko                                                | 06 <sup>0</sup> 16.889'/038 <sup>0</sup> 12.919' | 1914 | >20 years 1 12 month old             | 18.00 |
| 28 | Nach Shenkora                            | SNNP/Amaro special Wereda/ Jijola kebele/Kore village/Cheffa district | 05 <sup>0</sup> 40.446'/037 <sup>0</sup> 55.669' | 1410 | 2 <sup>nd</sup> ratoon/7 month old   | 18.00 |
| 29 | Andegna dereja Wonji                     | SNNP/Wolayta/Damotgale/Gacheno                                        | 07 <sup>0</sup> 02.280'/037 <sup>0</sup> 55.072' | 1882 | plant cane 1-2 month old             |       |
| 30 | Sidama/Yegamo Shenkora                   | SNNP/Amaro special Wereda/ Jijola kebele/Kore village/Cheffa district | 05 <sup>0</sup> 40.446'/037 <sup>0</sup> 55.669' | 1410 | 2 <sup>nd</sup> ratoon/7 month old   | 17.60 |
| 31 | Huleteгна dereja Jambo Kay               | Oromia/West Arsi/Wondo/Shesha kebele                                  | 07 <sup>0</sup> 05.662'/038 <sup>0</sup> 36.203' | 1705 | Plant cane 18 months old             | 16.00 |
| 32 | Andegna dereja Jambo Kay                 | Oromia/West Arsi/Wondo/Shesha kebele                                  | 07 <sup>0</sup> 05.662'/038 <sup>0</sup> 36.203' | 1705 | Plant cane 18 months old             | 14.77 |
| 33 | Sostegna dereja Jambo Kay/Metfo Shenkora | Oromia/West Arsi/Wondo/Shesha kebele                                  | 07 <sup>0</sup> 05.662'/038 <sup>0</sup> 36.203' | 1705 | Plant cane 18 months old             | 17.50 |
| 34 | Moliso                                   | SNNP/Konta Special Wereda/ Cheka Bocha kebele/Bocha village           | 07 <sup>0</sup> 05.953'/036 <sup>0</sup> 39.495' | 1996 | plant cane 7-8 month old             |       |
| 35 | Nach Shenkora                            | SNNP/Konta Special Wereda/ Cheka Bocha kebele                         | 07 <sup>0</sup> 06.244'/036 <sup>0</sup> 40.164' | 2105 | 5 <sup>th</sup> ratoon 8 month old   | 17.60 |
| 36 | Tazma/Burabure                           | SNNP/Konta Special Wereda/ Cheka Bocha kebele/Bocha village           | 07 <sup>0</sup> 05.953'/036 <sup>0</sup> 39.495' | 1996 | 4-5 th ratoon 8 months old           | 12.50 |
| 37 | Wolayta                                  | SNNP/Wolayta/Damotgale/Gacheno                                        | 07 <sup>0</sup> 02.280'/037 <sup>0</sup> 55.072' | 1882 | 2 <sup>nd</sup> ratoon/8 month old   | 14.67 |
| 38 | Kay Shenkora                             | SNNP/Dawro/Loma/Wushay                                                | 07 <sup>0</sup> 00.612'/037 <sup>0</sup> 12.285' | 2163 | 2 <sup>nd</sup> ratoon/5 month old   | 10.27 |
| 39 | Kay Shenkora                             | SNNP/Konta Special Wereda/ Cheka Bocha kebele/Bocha village           | 07 <sup>0</sup> 05.953'/036 <sup>0</sup> 39.495' | 1996 | Plant cane 7-8 month old             | 10.10 |
| 40 | Atena Moris                              | SSNP/Kembata Tembaro/Kacha Bira/Mesena                                | 07 <sup>0</sup> 10.944'/037 <sup>0</sup> 46.746' | 1838 | 2 <sup>nd</sup> ratoon/8 month old   | 12.93 |
| 41 | Dolche                                   | SNNP/Wolayta/Damotgale/Gacheno                                        | 07 <sup>0</sup> 02.280'/037 <sup>0</sup> 55.072' | 1882 | Plant cane 18 month old              | 15.83 |
| 42 | Kay Ageda Shenkora                       | SNNP/Halaba kulito Special Wereda/Alemtena                            | 07 <sup>0</sup> 22.433'/038 <sup>0</sup> 06.433' | 1797 | Plantcane 12 month old               | 12.17 |
| 43 | Moris                                    | SNNP/Halaba kulito Special Wereda/Alemtena                            | 07 <sup>0</sup> 22.433'/038 <sup>0</sup> 06.433' | 1797 | 3 <sup>rd</sup> ratoon/12 month old  | 20.17 |
| 44 | Bolfe                                    | SSNP/Kembata Tembaro/Kacha Bira/Mesena                                | 07 <sup>0</sup> 10.944'/037 <sup>0</sup> 46.746' | 1838 | Plant cane 12 month old              | 15.67 |
| 45 | Abesha                                   | SSNP/Kembata Tembaro/Kacha Bira/Mesena                                | 07 <sup>0</sup> 10.944'/037 <sup>0</sup> 46.746' | 1838 | 2 <sup>nd</sup> ratoon/12 month old  | 16.33 |
| 46 | Wotete                                   | SSNP/Kembata Tembaro/Kacha Bira/Mesena                                | 07 <sup>0</sup> 10.944'/037 <sup>0</sup> 46.746' | 1838 | Plant cane 10 month old              | 14.33 |
| 47 | Tazma/Burabure                           | SNNP/Dawro/Mareka/MedaKuli/Gendomeda                                  | 06 <sup>0</sup> 58.977'/037 <sup>0</sup> 11.493' | 1803 | 4 <sup>th</sup> ratoon/10 month old  | 17.33 |
| 48 | Betam Nach Shenkora                      | SNNP/Konta Special Wereda/ Cheka Bocha kebele                         | 07 <sup>0</sup> 06.244'/036 <sup>0</sup> 40.164' | 2105 | 5 <sup>th</sup> ratoon 7-8 month old | 14.00 |
| 49 | Wonji-1                                  | SSNP/Kembata Tembaro/ Kacha Bira/Wonko                                | 07 <sup>0</sup> 12.316'/037 <sup>0</sup> 50.843' | 1952 | 2 <sup>nd</sup> ratoon/6-7 month old | 14.87 |
| 50 | Bishoftu                                 | SSNP/Kembata Tembaro/ Kacha Bira/Wonko                                | 07 <sup>0</sup> 12.316'/037 <sup>0</sup> 50.843' | 1952 | 2 <sup>nd</sup> ratoon/6-7 month old | 16.67 |
| 51 | Wotet                                    | SNNP/Wolayta/Damotgale/ Gacheno                                       | 07 <sup>0</sup> 02.280'/037 <sup>0</sup> 55.072' | 1882 | Plant cane 18 month old              | 14.43 |



## Supplemental Table 3 continued

|    |                                      |                                                 |                                                   |        |                                               |       |
|----|--------------------------------------|-------------------------------------------------|---------------------------------------------------|--------|-----------------------------------------------|-------|
| 52 | Wotete                               | SNNP/Halaba kulito Special Wereda/ Bedene       | 07 <sup>0</sup> 22.637'/038 <sup>0</sup> 06.278'  | 1798   | 2 <sup>nd</sup> ratoon/6-7 month old          | 14.97 |
| 53 | Yeferenj shenkora                    | SNNP/Dawro/Mareka/MedaKuli/ Gendomeda           | 06 <sup>0</sup> 58.977'/037 <sup>0</sup> 11.493'  | 1803   | 5 <sup>th</sup> ratoon 12 month old           | 18.67 |
| 54 | Yemaytafit Shenkora                  | Oromia/Bale/Agarfa/Wabe                         |                                                   |        | taken from market                             |       |
| 55 | Kay Shenkora                         | Oromia/Arsi/Tena/Kereyuharzuna/ Debenshe        | 07 <sup>0</sup> 42.648'/039 <sup>0</sup> 35.844'  | 1848   | Plantcane 14 month old                        | 19.93 |
| 56 | Wotete                               | Oromia/Arsi/Tio/Bosha                           |                                                   | market | Plantcane 12-14 month old                     | 17.33 |
| 57 | Shenkora Dima/Kay Shenkora           | Oromia/Bale/Agarfa/Alochefo/                    | 07 <sup>0</sup> 23.154'/039 <sup>0</sup> 46.271'  | 1497   | > 60 years 7-8 month old                      | 16.67 |
| 58 | Nach Shenkora/Shenkora Adi           | Oromia/Arsi/Tena/Kereyuharzuna/Debenshe         | 07 <sup>0</sup> 42.648'/039 <sup>0</sup> 35.844'  | 1848   | Plantcane 14 month old                        | 21.30 |
| 59 | Nach Shenkora                        | Oromia/Bale/Agarfa/Alochefo/ Odachefo           | 07 <sup>0</sup> 23.154'/039 <sup>0</sup> 46.271'  | 1497   | > 60 years 4-5 month old                      | 15.43 |
| 60 | Moris                                | Oromia/Arsi/Tena/Kereyuharzuna/ Debenshe        | 07 <sup>0</sup> 42.648'/039 <sup>0</sup> 35.844'  | 1848   | Plantcane 12 month old                        | 16.73 |
| 61 | Kay Shenkora                         | Oromia/Bale/Goro/Melkabuta/ Gadula Gola Dhertu  | 06 <sup>0</sup> 58.539'/040 <sup>0</sup> 35.398'  | 1611   | Plantcane 12 month old                        | 18.67 |
| 62 | Ye Abesha Shenkora/Ye Oromo Shenkora | Oromia/West Shewa/Ambo/ Harutiro                | 09 <sup>0</sup> 07.613'/037 <sup>0</sup> 47.724'  | 2370   | 2 <sup>nd</sup> ratoon/1 year and             | 15.03 |
| 63 | Kay Shenkora/Wonji                   | Amhara/North Shewa/Debresina                    | 10 <sup>0</sup> 04.978'/039 <sup>0</sup> 53.606'  | 1276   | taken from market                             |       |
| 64 | Nach Shenkora                        | Amhara/North Shewa/Debresina                    | 10 <sup>0</sup> 04.978'/039 <sup>0</sup> 53.606'  | 1276   | taken from market                             |       |
| 65 | Tikur Ageda                          | Amhara/North Shewa/Kewet/Yelen                  | 10 <sup>0</sup> 04.978'/039 <sup>0</sup> 53.606'  | 1235   | Plantcane 8 month old                         | 16.73 |
| 66 | Nach Ageda                           | Amhara/North Shewa/Kewet/Yelen                  | 10 <sup>0</sup> 04.978'/039 <sup>0</sup> 53.606'  | 1235   | Plantcane 8 month old                         | 14.70 |
| 67 | Nach Kechacha Shenkora/Getr          | Amhara/North Shewa/Kewet/Yelen                  | 10 <sup>0</sup> 04.978'/039 <sup>0</sup> 53.606'  | 1235   | 3 <sup>rd</sup> ratoon/8 month old            | 16.00 |
| 68 | Ye Bako Shenkora                     | Oromia/West Shewa/Ambo/ Harutiro                | 09 <sup>0</sup> 07.613'/037 <sup>0</sup> 47.724'  | 2370   | 2 <sup>nd</sup> ratoon/1 year and 6 month old | 18.60 |
| 69 | Bula Shenkora                        | SNNP/Sheka/Masha/Shibo                          | 07 <sup>0</sup> 44.641'/035 <sup>0</sup> 28.511'  | 2277   | 2 <sup>nd</sup> ratoon/10-12 month old        | 17.43 |
| 70 | Kay Shenkora/Kadiken                 | Gambella/Agnewak/Abobo/Aberimeti                | 07 <sup>0</sup> 55.825'/ 034 <sup>0</sup> 43.133' | 507    | 2nd ratoon/3 month old                        | 18.30 |
| 71 | Bicha Shenkora                       | SNNP/Sheka/Masha/Beto                           | 07 <sup>0</sup> 44.641'/035 <sup>0</sup> 28.511'  | 2277   | Plantcane 12 month old                        | 17    |
| 72 | Shenkora Dima/Kay Shenkora           | Oromia/Illubabor/Bure/Wengawobe                 | 08 <sup>0</sup> 09.189'/035 <sup>0</sup> 27.382'  | 1758   | Plantcane 8 month old                         | 14    |
| 73 | Kay Shenkora Ageda                   | Oromia/Illubabor/Huka/Abyuadrere                | 08 <sup>0</sup> 13.781'/035 <sup>0</sup> 15.796'  | 1600   | Plantcane 12 month old                        | 12.93 |
| 74 | Nach Shenkora/Kadiken                | Gambella/Agnewak/Abobo/Aberimeti                | 07 <sup>0</sup> 55.825'/034 <sup>0</sup> 43.133'  | 507    | 2 <sup>nd</sup> ratoon/3 month old            | 12.40 |
| 75 | Shenkora                             | Gambella/Agnewak/Gog/Badabado                   | 07 <sup>0</sup> 38.955'/034 <sup>0</sup> 15.386'  | 454    | Taken from market                             |       |
| 76 | Tikur Ageda                          | SNNP/Sheka/Yeki/Addisbirhan                     | 07 <sup>0</sup> 11.212'/035 <sup>0</sup> 26.095'  | 1164   | 2 <sup>nd</sup> ratoon/10-12 month old        | 16.27 |
| 77 | Ye Kenya Ageda                       | SNNP/Sheka/Masha/Keja                           | 07 <sup>0</sup> 50.149'/035 <sup>0</sup> 28.159'  | 1827   | Plantcane 8 month old                         | 12.17 |
| 78 | Kay Ageda                            | SNNP/Sheka/Yeki/Addisbirhan                     | 07 <sup>0</sup> 11.212'/035 <sup>0</sup> 26.095'  | 1164   | 2 <sup>nd</sup> ratoon/10-12 month old        | 15.50 |
| 79 | Kay Shenkora/ Dima                   | Oromia/Jima Zone/ Sekoru Wereda/Habedode Kebele |                                                   |        | Taken from market                             |       |
| 80 | Ye Kenya Shenkora                    | SNNP/Sheka/Masha/Masha 01                       | 07 <sup>0</sup> 44.641'/035 <sup>0</sup> 28.511'  | 2277   |                                               |       |
| 81 | Kay Ageda                            | SNNP/Kefa/Gimbo/Bonga 01                        | 07 <sup>0</sup> 15.225'/036 <sup>0</sup> 15.303'  | 1792   | Plantcane 9 month old                         | 15.00 |

Supplemental Table 3 continued

|     |                                |                                                |                                                  |      |                                      |       |
|-----|--------------------------------|------------------------------------------------|--------------------------------------------------|------|--------------------------------------|-------|
| 82  | Tikur Ageda                    | SNNP/ Bench Majii /Mizan Teferi/ Hibret kebele | 07 <sup>0</sup> 00.061'/035 <sup>0</sup> 35.802' | 1356 | 10 <sup>th</sup> ratoon/12 month old | 20.00 |
| 83  | Shembeko Ageda                 | SNNP/Kefa/Gimbo/Bonga 01                       | 07 <sup>0</sup> 15.225'/036 <sup>0</sup> 15.303' | 1792 | 2 <sup>nd</sup> ratoon/7 month old   | 16.37 |
| 84  | Tikur Ageda                    | Oromia/Illubabor/Bilonopa/Suli                 | 08 <sup>0</sup> 26.252'/035 <sup>0</sup> 36.267' | 1417 | 2 <sup>nd</sup> ratoon/9 month old   | 14.53 |
| 85  | Nach Shenkora                  | Oromia/Illubabor/Bilonopa/Dizy                 | 08 <sup>0</sup> 23.138'/035 <sup>0</sup> 36.249' | 1559 | 2 <sup>nd</sup> ratoon/11 month old  | 17.40 |
| 86  | Nach Shenkora                  | Oromia/Illubabor/Dureni/                       | 08 <sup>0</sup> 29.860'/035 <sup>0</sup> 45.110' | 1754 | 10th ratoon/5-6 month old            | 11.75 |
| 87  | Dalecha Shenkora               | Oromia/Illubabor/Bilonopa/Suli                 | 08 <sup>0</sup> 26.252'/035 <sup>0</sup> 36.267' | 1417 | 2 <sup>nd</sup> ratoon/9 month old   | 12.60 |
| 88  | Ye Abesha Shenkora             | Oromia/Jimma/Agaro/Kesohiti                    | 07 <sup>0</sup> 51.305'/036 <sup>0</sup> 38.997' | 1579 | 4 <sup>th</sup> ratoon/8 month old   | 10.97 |
| 89  | Kay Shenkora Ageda             | Oromia/Illubabor/Bilonopa/Suli                 | 08 <sup>0</sup> 26.252'/035 <sup>0</sup> 36.267' | 1417 | 2 <sup>nd</sup> ratoon/9 month old   | 15.33 |
| 90  | Kay Shenkora                   | Oromia/Illubabor/Dureni/ Betelegebecha/Hadere  | 08 <sup>0</sup> 29.860'/035 <sup>0</sup> 45.110' | 1754 | 10th ratoon/8 month old              | 13.70 |
| 91  | Barbados                       | Oromia/Gimbi/Laloasabe/Harochserdo Kebele      |                                                  |      | Taken from market                    |       |
| 92  | Ye Bako Shenkora               | Oromia/Gimbi/Laloasabe/Dengoro 01/Golbe        | 09 <sup>0</sup> 16.130'/035 <sup>0</sup> 40.804' | 1730 | 2 <sup>nd</sup> ratoon/12 month old  | 14.90 |
| 93  | Kay shenkora                   | Oromia/Gimbi/Laloasabe/Dengoro 01/Golbe        | 09 <sup>0</sup> 16.130'/035 <sup>0</sup> 40.804' | 1730 | Plantcane 8 month old                | 15.4  |
| 94  | Ageda Adi                      | Oromia/Kelem Welega/Sayo/ Gelanometi/Sembo     | 08 <sup>0</sup> 32.704'/034 <sup>0</sup> 43.594' | 1730 | 2-3 ratoon/12 month old              | 13.67 |
| 95  | Dalecha Shenkora               | Oromia/Kelem Welega/Dale Wabera/Chanka Burore  | 08 <sup>0</sup> 49.268'/035 <sup>0</sup> 03.747' | 1470 | 2 <sup>nd</sup> ratoon/6-7 month old | 16.37 |
| 96  | Nach Shenkora                  | Oromia/Gimbi/Laloasabe/ Dengoro 01/Golbe       | 09 <sup>0</sup> 16.130'/035 <sup>0</sup> 40.804' | 1730 | 2 <sup>nd</sup> ratoon/12 month old  | 15.93 |
| 97  | Tabor Shenkora                 | Oromia/Gimbi/Guliso/Wereseyo/ Kobera           | 09 <sup>0</sup> 10.256'/035 <sup>0</sup> 31.592' | 1484 | 3 <sup>rd</sup> ratoon/12 month old  | 17.97 |
| 98  | Nach Shenkora/Ye Jima Shenkora | Benshangulgumuz/Asosa/Bambasi Mender 49        | 09 <sup>0</sup> 49.520'/034 <sup>0</sup> 41.766' | 1415 | Plantcane 7 month old                | 15.43 |
| 99  | Shilmu                         | Oromia/Kelem Welega/Dale Wabera/Chanka Burore  | 08 <sup>0</sup> 49.268'/035 <sup>0</sup> 03.747' | 1470 | 2 <sup>nd</sup> ratoon/6-7 month old | 13.27 |
| 100 | Nach Shenkora                  | Oromia/Kelem Welega/Hawagelan/ Haromechara     | 08 <sup>0</sup> 43.544'/034 <sup>0</sup> 59.141' | 1444 | Plantcane 12-13 month old            | 16.50 |
| 101 | Kay Shenkora                   | Oromia/West Shewa/Bakotibe/ Dembigobu          | 09 <sup>0</sup> 07.616'/037 <sup>0</sup> 04.565' | 1620 | 2 <sup>nd</sup> ratoon/8 month old   | 14.80 |
| 102 | Buli                           | Oromia/Kelem Welega/Dale Wabera/Chanka         | 08 <sup>0</sup> 51.507'/035 <sup>0</sup> 04.122' | 1487 | 2 <sup>nd</sup> ratoon/6-7 month old | 12.67 |
| 103 | Nach Ageda                     | Oromia/Kelem Welega/Hawagelan/Haromechara      | 08 <sup>0</sup> 43.544'/034 <sup>0</sup> 59.141' | 1444 | 3 <sup>rd</sup> ratoon 12 month old  | 20.73 |
| 104 | Burabure Shenkora              | Benshangulgumuz/Asosa/Megele 32 (Sefera Tabia) | 10 <sup>0</sup> 01.179'/034 <sup>0</sup> 32.705' | 1478 | 2 <sup>nd</sup> ratoon/7 month old   | 17.27 |
| 105 | Nach Shenkora                  | Benshangulgumuz/Asosa/Megele 32(Sefera Tabia)  | 10 <sup>0</sup> 01.179'/034 <sup>0</sup> 32.705' | 1478 | 2 <sup>nd</sup> ratoon/7 month old   | 20.30 |
| 106 | Abesha Shenkora/Adi            | Oromia/West Shewa/Bakotibe/Dembigobu           | 09 <sup>0</sup> 07.616'/037 <sup>0</sup> 04.565' | 1620 | 2 <sup>nd</sup> ratoon/8 month old   | 17.87 |
| 107 | Nach Shenkora                  | Amhara/Debub Gondar/Derra/ Mashenkoru/Misgano  | 11 <sup>0</sup> 42.976'/037 <sup>0</sup> 36.908  | 1993 | Plantcane 10 month old               | 14.93 |
| 108 | Yeferenj Shenkora/Mogn Aybela  | Amhara/Debub Gondar/Fogera/ Wereta             | 11 <sup>0</sup> 55.550'/037 <sup>0</sup> 41.751' | 1820 | Taken from market                    |       |
| 109 | Kay Shenkora/Shilmlim/Burabure | Amhara/Debub Gondar/Fogera/ Wereta             | 11 <sup>0</sup> 55.550'/037 <sup>0</sup> 41.751' | 1820 | Taken from market                    |       |

## Supplemental Table 3 continued

|     |                                    |                                                              |                                                  |      |                                               |       |
|-----|------------------------------------|--------------------------------------------------------------|--------------------------------------------------|------|-----------------------------------------------|-------|
| 110 | Yegojam Shenkora                   | Amhara/Debub Gondar/Fogera/Wagtera                           | 11 <sup>0</sup> 54.574'/037 <sup>0</sup> 33.371' | 1797 | 7th ratoon/12 month old                       | 13.83 |
| 111 | Tikur Shenkora                     | Amhara/West Gojam/Bahirdar Zuria/<br>Tis Abay/Gebere Mahiber | 11 <sup>0</sup> 29.128'/037 <sup>0</sup> 34.331' | 1642 | 3 <sup>rd</sup> ratoon/10 month old           | 22.57 |
| 112 | Yeferenj Shenkora/Mogn Aybela      | Amhara/West Gojam/Bahirdar Zuria/ Tis<br>Abay/Gebere Mahiber | 11 <sup>0</sup> 29.128'/037 <sup>0</sup> 34.331' | 1642 | Plantcane 11 month old                        | 16.87 |
| 113 | Shilmlm Sora                       | Amhara/West Gojam/Bahirdar Zuria/<br>Tis Abay/Gebere Mahiber | 11 <sup>0</sup> 29.128'/037 <sup>0</sup> 34.331' | 1642 | Plantcane 11 month old                        | 14.20 |
| 114 | Ye Bure Shenkora                   | Amhara/West Gojam/Bahirdar Zuria/<br>Tis Abay/Gebere Mahiber | 11 <sup>0</sup> 29.128'/037 <sup>0</sup> 34.331' | 1642 | 3 <sup>rd</sup> ratoon/11-12 month old        | 21.03 |
| 115 | Nach Ageda                         | Amhara/West Gojam/Jabitehnan/<br>Mankusa Abdegom/Endalah     | 10 <sup>0</sup> 41.075'/037 <sup>0</sup> 11.357' | 1941 | 2 <sup>nd</sup> ratoon/1 year and 6 month old | 20.43 |
| 116 | Tikur Shenkora                     | Amhara/West Gojam/Jabitehnan/<br>Mankusa Abdegom/Endalah     | 10 <sup>0</sup> 41.075'/037 <sup>0</sup> 11.357' | 1941 | 2 <sup>nd</sup> ratoon/1 year and 6 month old | 21.63 |
| 117 | Nach Shenkora/Sendel               | Amhara/West Gojam/Debub Achefer/<br>Lalibela/Azena           | 11 <sup>0</sup> 28.590'/036 <sup>0</sup> 57.027' | 1883 | 3 <sup>rd</sup> ratoon/8 month old            | 16.33 |
| 118 | Nach Yemailat Shenkora/ CO<br>1001 | Amhara/West Gojam/Debub Achefer/<br>Lalibela/Azena           | 11 <sup>0</sup> 28.590'/036 <sup>0</sup> 57.027' | 1883 | 4 <sup>th</sup> ratoon/8 month old            | 20.33 |
| 119 | Bule/ B52                          | Amhara/West Gojam/Debub Achefer/<br>Lalibela/Azena           | 11 <sup>0</sup> 28.590'/036 <sup>0</sup> 57.027' | 1883 | 4 <sup>th</sup> ratoon/8 month old            | 15.93 |
| 120 | Kay Shenkora                       | Amhara/West Gojam/Debub Achefer/<br>Lalibela/Azena           | 11 <sup>0</sup> 28.590'/036 <sup>0</sup> 57.027' | 1883 | 4 <sup>th</sup> ratoon/8 month old            | 20.50 |
| 121 | Nach Shenkora                      | Amhara/West Gojam/Debub Achefer/<br>Lalibela/Azena           | 11 <sup>0</sup> 28.590'/036 <sup>0</sup> 57.027' | 1883 | 3 <sup>rd</sup> ratoon/8 month old            | 16    |
| 122 | Nach Shenkora                      | BenshangulGumuz/Metekel/Pawe/<br>Mender 28/29                | 11 <sup>0</sup> 16.526'/036 <sup>0</sup> 27.233' | 1097 | 3 <sup>rd</sup> ratoon/8-9 month old          | 17.87 |
| 123 | Kay Shenkora                       | Amhara/Awi/Guangua/Mota/ Menta Wuha                          | 10 <sup>0</sup> 50.310'/036 <sup>0</sup> 20.642' | 1532 | 2 <sup>nd</sup> ratoon/6-7 month old          | 16.83 |
| 124 | Kay Shenkora                       | BenshangulGumuz/Metekel/Pawe/<br>Mender 28/29                | 11 <sup>0</sup> 16.526'/036 <sup>0</sup> 27.233' | 1097 | 3 <sup>rd</sup> ratoon/8-9 month old          | 16.17 |
| 125 | Tikur Shenkora                     | Amhara/Awi/Guangua/Mota/ Menta Wuha                          | 10 <sup>0</sup> 50.310'/036 <sup>0</sup> 20.642' | 1532 | 2 <sup>nd</sup> ratoon/6-7 month old          | 19.10 |
| 126 | Nach Shenkora                      | Amhara/Awi/Guangua/Mota/ Menta Wuha                          | 10 <sup>0</sup> 50.310'/036 <sup>0</sup> 20.642' | 1532 | 2 <sup>nd</sup> ratoon/6-7 month old          | 16.77 |
| 127 | Nach Shenkora/<br>Bishoftu/ China  | Amhara/East Gojam/Dejen/Kurar/ Dengel                        | 10 <sup>0</sup> 06.578'/038 <sup>0</sup> 09.202' | 1820 | Plantcane 10 month old                        | 16.27 |
| 128 | Gojame/Ye Gojam Ageda              | Amhara/East Gojam/Dejen/Kurar/ Ambayamit                     | 10 <sup>0</sup> 06.490'/038 <sup>0</sup> 09.185' | 1804 | 26th ratoon 5 month old                       | 13.50 |
| 129 | Nach Shenkora                      | Amhara/East Gojam/Dejen/Kurar/ Dengel                        | 10 <sup>0</sup> 06.578'/038 <sup>0</sup> 09.202' | 1820 | 2 <sup>nd</sup> ratoon/7 month old            | 16.10 |
| 130 | Kay Shenkora                       | Amhara/East Gojam/Basoliben/ Yejube                          | 10 <sup>0</sup> 06.490'/037 <sup>0</sup> 09.185' | 1800 | Taken from market                             |       |

## Supplemental Table 3 continued

|     |                         |                                                                      |                                                   |      |                                               |       |
|-----|-------------------------|----------------------------------------------------------------------|---------------------------------------------------|------|-----------------------------------------------|-------|
| 132 | Abadir                  | Amhara/East Gojam/Dejen/Kurar/ Ambayamit                             | 10 <sup>0</sup> 06.490'/038 <sup>0</sup> 09.185'  | 1804 | 2 <sup>nd</sup> ratoon/12 month old           | 13.50 |
| 133 | Ye Fincha Shenkora      | Amhara/East Gojam/Basoliben/ Entemen Dejat                           | 10 <sup>0</sup> 03.504'/037 <sup>0</sup> 50.264'  | 2360 | Plant cane 1 year and 2 month                 | 20.33 |
| 134 | Kay Ageda               | Amhara/East Gojam/Dejen/Dejen Town                                   |                                                   |      | Taken from Dejen market                       |       |
| 135 | Kay Ageda               | Amhara/East Gojam/Dejen/Yibeza Michael                               |                                                   |      | Taken from Dejen market                       |       |
| 136 | Bicha Shenkora          | Amhara/East Gojam/Dejen/Kurar/ Dengel                                | 10 <sup>0</sup> 06.578'/038 <sup>0</sup> 09.202'  | 1820 | 3 <sup>rd</sup> ratoon/9 month old            | 21.60 |
| 137 | Key Shenkora/Bishoftu   | Amhara/East Gojam/Dejen/Kurar/Dengel                                 | 10 <sup>0</sup> 06.578'/ 038 <sup>0</sup> 09.202' | 1820 | 2nd ratoon/1+1/2 year old                     | 19.93 |
| 138 | Kay Ageda               | Tigray/Semen Mierab Tigray/Tach Koraro/<br>Semena/ Maymesreb         | 14 <sup>0</sup> 11.602'/038 <sup>0</sup> 20.897'  | 1927 | 2 <sup>nd</sup> ratoon/12 month old           | 16.60 |
| 139 | Kay Shenkora            | Tigray/Central Tigray/Tahtay Maychew/ Mayatsmi                       | 14 <sup>0</sup> 04.680'/038 <sup>0</sup> 33.366'  | 1993 | 2 <sup>nd</sup> ratoon/6 month old            | 23.27 |
| 140 | Kay Ageda               | Tigray/Semen Mierab Tigray/Tach Koraro/<br>Semena/ Maymesreb         | 14 <sup>0</sup> 11.602'/038 <sup>0</sup> 20.897'  | 1927 | 2 <sup>nd</sup> ratoon/12 month old           | 15.77 |
| 141 | Nach Shenkora           | Tigray/Central Tigray/Tahtay Maychew/Mayatsmi                        | 14 <sup>0</sup> 04.680'/038 <sup>0</sup> 33.366'  | 1993 | 2 <sup>nd</sup> ratoon/6 month old            | 11.50 |
| 142 | Kay Ageda               | Tigray/Semen Mierab Tigray/Tach Koraro/Semena                        | 14 <sup>0</sup> 11.602'/038 <sup>0</sup> 20.897'  | 1927 | 2 <sup>nd</sup> ratoon/12 month old           | 16.23 |
| 143 | Nach Ageda/ Shenkora    | Amhara/Semen Welo/Gubalafto/ Woynye<br>011/Medakit                   | 11 <sup>0</sup> 53.630'/039 <sup>0</sup> 28.136'  | 2030 | 4 <sup>th</sup> ratoon/1 year and 4 month old | 21.03 |
| 144 | Kay Ageda/ Shenkora     | Amhara/Semen Welo/Gubalafto/<br>Woynye 011/Medakit                   | 11 <sup>0</sup> 53.630'/039 <sup>0</sup> 28.136'  | 2030 | 4 <sup>th</sup> ratoon/1 year and 4 month old | 17.87 |
| 145 | Kay Shenkora (Burabure) | Amhara/Semen Welo/Habru/09 kebele/ Ante                              | 11 <sup>0</sup> 41.085'/039 <sup>0</sup> 38.325'  | 1695 | Plantcane 6 month old                         | 17.33 |
| 146 | Nach Ye Abesha Shenkora | Amhara/Semen Welo/Habru/09 kebele/ Ante                              | 11 <sup>0</sup> 41.085'/039 <sup>0</sup> 38.325'  | 1695 | 7 <sup>th</sup> ratoon 5 month old            | 17.70 |
| 147 | Kay Shenkora            | Amhara/Debub Welo/Werebabo/02<br>kebele/Bulbulo/Aselel Prim. School  | 11 <sup>0</sup> 19.354'/039 <sup>0</sup> 45.074'  | 2072 | 2 <sup>nd</sup> ratoon/10--12 month old       | 13.93 |
| 148 | Tikur Ageda             | Amhara/Semen Welo/Habru/Mersa Town                                   |                                                   |      | Taken from market                             |       |
| 149 | Nach Tilik Shenkora     | Amhara/Debub Welo/Werebabo/<br>02 kebele/Bulbulo/Aselel Prim. School | 11 <sup>0</sup> 19.354'/039 <sup>0</sup> 45.074'  | 2072 | 5 <sup>th</sup> ratoon 12 month old           | 18.23 |
| 150 | Nach Shenkora           | Amhara/ Oromia special Zone/Kemissie/02<br>kebele/Ergi               | 10 <sup>0</sup> 42.491'/039 <sup>0</sup> 51.712'  | 1422 | 5 <sup>th</sup> ratoon 5-6 month old          | 19.90 |
| 151 | Nach Ageda              | Amhara/Debub Welo/Borena/04 kebele/ Jimaye                           | 10 <sup>0</sup> 45.172'/038 <sup>0</sup> 45.974'  | 2687 | Taken from market                             |       |
| 152 | Nach Tinish Shenkora    | Amhara/Debub Welo/Werebabo/<br>02 kebele/Bulbulo/Aselel Prim. School | 11 <sup>0</sup> 19.354'/039 <sup>0</sup> 45.074'  | 2072 | 2 <sup>nd</sup> ratoon/10--12 month old       | 18.34 |
| 153 | Ye Beskula Shenkora     | Amhara Region/South Welo Zone/ Legambo<br>Wereda/Beskula Kebele      |                                                   |      | Taken from market                             |       |
| 154 | Kay Shenkora            | Amhara/ Oromia special Zone/Kemissie/02<br>kebele/Ergi               | 10 <sup>0</sup> 42.491'/039 <sup>0</sup> 51.712'  | 1422 | 5 <sup>th</sup> ratoon 5-6 month old          | 21.13 |
| 155 | Nach Ye Abesha Shenkora | Amhara/Semen Welo/Meket/013 kebele/ Emamoz<br>Fikrte Kirstos Gedam   |                                                   |      | Brought by monks from the<br>monastery        |       |
| 156 | Nach Ageda/ Shenkora    | Amhara/Waghmra/Sekota/02 kebele/ Tiya                                | 12 <sup>0</sup> 30.391'/039 <sup>0</sup> 05.795'  | 1978 | 2 <sup>nd</sup> ratoon/5 month old            | 15.87 |

Supplemental Table 3 continued

|     |                         |                                                               |                                                  |      |                                     |       |
|-----|-------------------------|---------------------------------------------------------------|--------------------------------------------------|------|-------------------------------------|-------|
| 157 | Kay Ageda/Shenkora      | Tigray/Debut Tigray/Ofla/Zata                                 | 12 <sup>0</sup> 30.924'/039 <sup>0</sup> 16.477' | 2134 | Plant cane 8 month old              | 16.47 |
| 158 | Ancha                   | Tigray/Debut Tigray/Ofla/Zata                                 | 12 <sup>0</sup> 30.924'/039 <sup>0</sup> 16.477' | 2134 | Plant cane 8 month old              | 15.37 |
| 159 | Nach Shenkora           | Oromia/East Hararghe/Gurawa/01 Kebele/Kera Sefr               | 09 <sup>0</sup> 08.392'/041 <sup>0</sup> 50.424' | 2401 | 11 year ratoon 9 month old          | 17.90 |
| 160 | Shenkora Adi            | Oromia/East Hararghe/Kurfachele/Dawe/                         | 09 <sup>0</sup> 17.423'/041 <sup>0</sup> 52.611' | 1713 | 3 <sup>rd</sup> ratoon/6 month old  | 14.50 |
| 161 | Nach Shenkora           | Oromia/East Hararghe/Meta/Chelenko 02 kebele                  | 09 <sup>0</sup> 23.875'/041 <sup>0</sup> 33.670' | 2179 | 4 <sup>th</sup> ratoon/9 month old  | 15.07 |
| 162 | Shenkora Dima           | Oromia/East Hararghe/Kurfachele/Dawe/                         | 09 <sup>0</sup> 17.423'/041 <sup>0</sup> 52.611' | 1713 | Taken from market                   |       |
| 163 | Nach Shenkora/Wonji     | Oromia/East Hararghe/Meta/Chelenko 02 kebele                  | 09 <sup>0</sup> 23.875'/041 <sup>0</sup> 33.670' | 2179 | 4 <sup>th</sup> ratoon/9 month old  | 17.70 |
| 164 | Yemilat Nach Shenkora   | Oromia/East Hararghe/Meta/Chelenko 02 kebele                  | 09 <sup>0</sup> 23.875'/041 <sup>0</sup> 33.670' | 2179 | 4 <sup>th</sup> ratoon/9 month old  | 20.50 |
| 166 | Burabure Shenkora       | Harari/Erer Wereda/Dodota Kebele/Mudir Village                | 09 <sup>0</sup> 19.353'/042 <sup>0</sup> 13.030' | 1376 | 2 <sup>nd</sup> ratoon/3 month old  | 12.70 |
| 167 | Kay Shenkora            | Oromia/East Hararghe/Babile/Ererguda/Megida                   | 09 <sup>0</sup> 14.783'/042 <sup>0</sup> 15.022' | 1315 | 2 <sup>nd</sup> ratoon/6 month old  | 12.34 |
| 168 | Nach Shenkora           | Oromia/East Hararghe/Babile/Ererguda/Megida                   | 09 <sup>0</sup> 14.783'/042 <sup>0</sup> 15.022' | 1315 | 3 <sup>rd</sup> ratoon/7 month old  | 13.34 |
| 169 | Kay Shenkora/Burabure   | Oromia/East Hararghe/Babile/Ererguda/Megida                   | 09 <sup>0</sup> 14.783'/042 <sup>0</sup> 15.022' | 1315 | 2 <sup>nd</sup> ratoon/6 month old  | 12.48 |
| 170 | Kay Shenkora            | Oromia/East Hararghe/Kombolcha/Sibilu/Gende Wedo Usman        | 09 <sup>0</sup> 25.248'/042 <sup>0</sup> 06.965' | 2113 | Plant cane/6 month old              | 13.84 |
| 171 | Kay Shenkora/Burabure   | Oromia/East Hararghe/Gorogutu/Erermedanchine                  | 09 <sup>0</sup> 24.966'/041 <sup>0</sup> 29.590' | 1728 | 6 <sup>th</sup> ratoon 6 month old  | 16.83 |
| 172 | Guracha Shenkora/Tikur  | Oromia/East Harerge/Babile/Ererguda/Megida                    | 09 <sup>0</sup> 14.783'/042 <sup>0</sup> 15.022' | 1315 | 2 <sup>nd</sup> ratoon/9 month old  | 13.56 |
| 173 | Misrah                  | Oromia/West Hararghe/Gemechis/Wemecho Dayo/Dekadabu           | 08 <sup>0</sup> 45.408'/040 <sup>0</sup> 53.285' | 1496 | 2 <sup>nd</sup> ratoon/10 month old | 16.57 |
| 174 | Wonji                   | Oromia/West Hararghe/Gemechis/Wemecho Dayo/Dekadabu           | 08 <sup>0</sup> 45.408'/040 <sup>0</sup> 53.285' | 1496 | 2 <sup>nd</sup> ratoon/6 month old  | 15.40 |
| 175 | Wonji/Bula/Shenkora Adi | Oromia/West Hararghe/Gubakoricha/Oda Aneni 05 kebele/Nanofaro | 08 <sup>0</sup> 56.717'/040 <sup>0</sup> 33.308' | 1972 | Plantcane 12 month old              | 15.03 |
| 176 | Shekole                 | Oromia/West Hararghe/Gubakoricha/Oda Aneni 05 kebele/Nanofaro | 08 <sup>0</sup> 56.717'/040 <sup>0</sup> 33.308' | 1972 | 6 <sup>th</sup> ratoon 9 month old  | 13.90 |
| 177 | Holland                 | Oromia/West Hararghe/Darolebu                                 | 08 <sup>0</sup> 36.352'/040 <sup>0</sup> 19.278' | 1751 | 3 <sup>rd</sup> ratoon/6 month old  | 15.37 |
| 178 | Bure                    | Oromia/West Hararghe/Gubakoricha/Oda Aneni 05 kebele/Nanofaro | 08 <sup>0</sup> 56.717'/040 <sup>0</sup> 33.308' | 1972 | Plantcane 8 month old               | 13.47 |
| 179 | Shenkora Dima           | Oromia/West Hararghe/Mesela/Lubudekeb/Deneba                  | 09 <sup>0</sup> 05.913'/041 <sup>0</sup> 08.151' | 1647 | 2 <sup>nd</sup> ratoon/12 month old | 14.90 |
| 180 | Wonji                   | Oromia/West Hararghe/Mesela/Lubudekeb/Deneba                  | 09 <sup>0</sup> 05.913'/041 <sup>0</sup> 08.151' | 1647 | 2 <sup>nd</sup> ratoon/12 month old | 16.03 |
| 181 | Gende Lega              | Oromia/West Hararghe/Gubakoricha/Oda Aneni 05 kebele/Nanofaro | 08 <sup>0</sup> 56.717'/040 <sup>0</sup> 33.308' | 1972 | Plantcane 8 month old               | 15.40 |
| 182 | Dikala                  | Oromia/East Hararghe/Deder/Kiyo (Nedi Gelan Sedi)/Tulu        | 09 <sup>0</sup> 15.638'/041 <sup>0</sup> 23.451' | 1812 | 4 <sup>th</sup> ratoon/12 month old | 16.27 |
| 183 | Alaa                    | Oromia/East Hararghe/Deder/Kiyo                               | 09 <sup>0</sup> 15.638'/041 <sup>0</sup> 23.451' | 1812 | Plantcane 12 month old              | 15.13 |

## Supplemental Table 3 continued

|     |                           |                                                           |                                                   |      |                                      |       |
|-----|---------------------------|-----------------------------------------------------------|---------------------------------------------------|------|--------------------------------------|-------|
| 184 | Bure                      | Somali/Shinele/Erer/Bila                                  | 09 <sup>0</sup> 31.774'/041 <sup>0</sup> 24.965'  | 1192 | 3 <sup>rd</sup> ratoon/4 month old   | 12.00 |
| 185 | Bure                      | Somali/Shinele/Erer/ Gota                                 |                                                   |      | Taken from market                    |       |
| 186 | Shenkora Dima             | Somali/Shinele/Erer/Bila                                  | 09 <sup>0</sup> 31.774'/041 <sup>0</sup> 24.965'  | 1192 | 4 <sup>th</sup> ratoon/8 month old   | 8.23  |
| 187 | Shenkora Adi              | Oromia/Eastern Haraghe Zone/ Meta/ Ramis                  |                                                   |      | Bought at Kulubi market              |       |
| 188 | Aladi                     | Oromia/East Hararghe/Deder/Kiyo (Nedi Gelan Sedi)/Tulu    | 09 <sup>0</sup> 15.638'/041 <sup>0</sup> 23.451'  | 1812 | 2 <sup>nd</sup> ratoon/6 month old   | 13.25 |
| 189 | Erero                     | Oromia/East Hararghe/Deder/Kiyo (Nedi Gelan Sedi)/Tulu    | 09 <sup>0</sup> 15.638'/041 <sup>0</sup> 23.451'  | 1812 | Plant cane 9 month old               | 15.84 |
| 190 | Engda                     | Oromia/West Hararghe/Anchar/Chorchora/Megala Deye Market  | 08 <sup>0</sup> 47.508'/040 <sup>0</sup> 17.063   | 1690 | 2 <sup>rd</sup> ratoon/8 month old   | 14.48 |
| 191 | Kay Shenkora              | Oromia/West Hararghe/Anchar/Chorchora/ Megala Deye Market | 08 <sup>0</sup> 47.508'/040 <sup>0</sup> 17.063   | 1690 | 2 <sup>nd</sup> ratoon/12 month old  | 17.93 |
| 192 | Kay shenkora              | Benshangulgumuz/Asosa/ Megele 32(Sefera Tabia)            | 10 <sup>0</sup> 01.179'/ 034 <sup>0</sup> 32.705' | 1478 | 2 <sup>nd</sup> ratoon/7 month old   | 18.80 |
| 193 | Ye Dengoro Shenkora       | Benshangulgumuz/Kemashe/Kemashe                           | 09 <sup>0</sup> 30.200'/ 035 <sup>0</sup> 51.825' | 1343 | 2 <sup>rd</sup> ratoon/10 month old  | 16.45 |
| 194 | Nach Shenkora             | BenshangulGumuz/Metekel/Pawe/Mender 24                    | 11 <sup>0</sup> 22.501'/ 036 <sup>0</sup> 34.435' | 1197 | 2 <sup>nd</sup> ratoon/7 month old   | 14.36 |
| 195 | Bale Mesmer Kay Shenkora  | BenshangulGumuz/Metekel/Pawe/Mender 24                    | 11 <sup>0</sup> 22.501'/ 036 <sup>0</sup> 34.435' | 1197 | 3 <sup>rd</sup> ratoon/8-9 month old | 17.20 |
| 196 | NachShenkora/Shenkora Adi | Benshangulgumuz/Kemashe/Kemashe                           | 09 <sup>0</sup> 30.200'/ 035 <sup>0</sup> 51.825' | 1343 | 10th ratoon/5-6 month old            | 11.75 |

**. Supplemental Table 4. Introduced sugarcane varieties used for morphological diversity study**

| Code No. | Cultivar   | Country of origin | Year of introduction |
|----------|------------|-------------------|----------------------|
| 200      | B 41227    | Barbados          | 1957                 |
| 224      | B 52298    | Barbados          | 1965                 |
| 269      | CO 449     | Coimbatore        | 1957                 |
| 279      | CO 678     | Coimbatore        | 1960                 |
| 280      | CO 680     | Coimbatore        | 1963                 |
| 283      | CO 740     | Coimbatore        | 1962                 |
| 360      | DB 377/60  | Demerara (Guyana) | 1974                 |
| 392      | Mex 54/245 | Mexico            | 1970                 |
| 401      | N 14       | Natal (South A.)  | 1980                 |
| 424      | NCO 334    | Natal (South A.)  | 1962                 |
| 236      | B 58230    | Barbados          | 1970                 |
| 238      | B 59212    | Barbados          | 1974                 |
| 266      | CO 421     | Coimbatore        | 1954                 |
| 355      | D 42/58    | Demerara (Guyana) | 1974                 |
| 412      | C86-165    | Cuba              | 2003                 |

Supplemental Table 5. Frequency distribution for 16 qualitative characters in sugarcane by regions in Ethiopia and country of sources of introduced genotypes

| Location      | Presence or absence of bud cushion |      | Relative degree of bud extension |      |      | Relative bud Shape |      |      |      |      |      |      |      |      |      |      |      |      | Canopy structure |      |      |      |      |      |      |  |
|---------------|------------------------------------|------|----------------------------------|------|------|--------------------|------|------|------|------|------|------|------|------|------|------|------|------|------------------|------|------|------|------|------|------|--|
|               | 1                                  | 2    | 1                                | 2    | 3    | 1                  | 2    | 3    | 4    | 5    | 6    | 7    | 8    | 9    | 10   | 11   | 12   | 13   | 1                | 2    | 3    | 4    | 5    | 6    | 8    |  |
| Amhara        | 0.26                               | 0.74 | 0.05                             | 0.39 | 0.55 | 0.39               | 0.01 | 0.16 | 0.11 | 0.01 | 0.04 | 0.00 | 0.11 | 0.01 | 0.08 | 0.07 | 0.03 | 0.00 | 0.18             | 0.05 | 0.21 | 0.16 | 0.07 | 0.25 | 0.08 |  |
| Benshangul G. | 0.38                               | 0.63 | 0.06                             | 0.38 | 0.56 | 0.06               | 0.00 | 0.19 | 0.13 | 0.00 | 0.19 | 0.06 | 0.13 | 0.00 | 0.06 | 0.13 | 0.06 | 0.00 | 0.25             | 0.00 | 0.13 | 0.25 | 0.19 | 0.19 | 0.00 |  |
| Introduction  | 0.37                               | 0.63 | 0.17                             | 0.37 | 0.47 | 0.10               | 0.00 | 0.13 | 0.03 | 0.03 | 0.00 | 0.07 | 0.20 | 0.07 | 0.07 | 0.30 | 0.00 | 0.00 | 0.23             | 0.20 | 0.17 | 0.07 | 0.10 | 0.23 | 0.00 |  |
| Oromia        | 0.31                               | 0.69 | 0.03                             | 0.42 | 0.54 | 0.36               | 0.01 | 0.19 | 0.14 | 0.01 | 0.08 | 0.03 | 0.09 | 0.03 | 0.00 | 0.07 | 0.00 | 0.02 | 0.07             | 0.10 | 0.14 | 0.25 | 0.04 | 0.40 | 0.01 |  |
| SNNPR         | 0.25                               | 0.75 | 0.03                             | 0.46 | 0.51 | 0.28               | 0.01 | 0.17 | 0.15 | 0.04 | 0.09 | 0.00 | 0.06 | 0.06 | 0.03 | 0.12 | 0.01 | 0.00 | 0.18             | 0.05 | 0.14 | 0.11 | 0.06 | 0.44 | 0.03 |  |
| Tigray        | 0.42                               | 0.58 | 0.17                             | 0.25 | 0.58 | 0.50               | 0.00 | 0.17 | 0.13 | 0.00 | 0.04 | 0.00 | 0.04 | 0.08 | 0.00 | 0.04 | 0.00 | 0.00 | 0.08             | 0.08 | 0.21 | 0.21 | 0.17 | 0.25 | 0.00 |  |
| All           | 0.30                               | 0.70 | 0.06                             | 0.41 | 0.53 | 0.31               | 0.01 | 0.17 | 0.12 | 0.02 | 0.07 | 0.02 | 0.09 | 0.04 | 0.03 | 0.10 | 0.01 | 0.01 | 0.15             | 0.08 | 0.16 | 0.17 | 0.07 | 0.35 | 0.01 |  |

| Location      | Relative shape of dewlap |      |      |      |      |      |      |      |      |      |      | Relative plant erectness |      |      |      |      |      |      | Relative degree of internode alignment |  |  |
|---------------|--------------------------|------|------|------|------|------|------|------|------|------|------|--------------------------|------|------|------|------|------|------|----------------------------------------|--|--|
|               | 1                        | 2    | 4    | 5    | 6    | 7    | 8    | 9    | 10   | 11   | 4    | 5                        | 6    | 7    | 8    | 9    | 1    | 2    | 3                                      |  |  |
| Amhara        | 0.03                     | 0.12 | 0.18 | 0.04 | 0.16 | 0.13 | 0.00 | 0.01 | 0.05 | 0.28 | 0.00 | 0.01                     | 0.08 | 0.17 | 0.34 | 0.39 | 0.22 | 0.46 | 0.32                                   |  |  |
| Benshangul G. | 0.13                     | 0.31 | 0.19 | 0.00 | 0.06 | 0.19 | 0.00 | 0.00 | 0.00 | 0.13 | 0.00 | 0.00                     | 0.06 | 0.13 | 0.31 | 0.50 | 0.13 | 0.69 | 0.19                                   |  |  |
| Introduction  | 0.07                     | 0.13 | 0.10 | 0.03 | 0.20 | 0.27 | 0.00 | 0.07 | 0.00 | 0.13 | 0.00 | 0.03                     | 0.00 | 0.03 | 0.13 | 0.77 | 0.43 | 0.30 | 0.27                                   |  |  |
| Oromia        | 0.12                     | 0.15 | 0.08 | 0.06 | 0.18 | 0.15 | 0.03 | 0.02 | 0.04 | 0.16 | 0.05 | 0.01                     | 0.02 | 0.23 | 0.34 | 0.36 | 0.32 | 0.45 | 0.23                                   |  |  |
| SNNPR         | 0.12                     | 0.18 | 0.05 | 0.04 | 0.06 | 0.22 | 0.02 | 0.04 | 0.02 | 0.25 | 0.03 | 0.00                     | 0.04 | 0.15 | 0.39 | 0.39 | 0.32 | 0.43 | 0.25                                   |  |  |
| Tigray        | 0.13                     | 0.13 | 0.17 | 0.00 | 0.21 | 0.08 | 0.00 | 0.00 | 0.00 | 0.29 | 0.00 | 0.00                     | 0.04 | 0.25 | 0.33 | 0.38 | 0.29 | 0.33 | 0.38                                   |  |  |
| All           | 0.10                     | 0.16 | 0.11 | 0.04 | 0.14 | 0.17 | 0.02 | 0.02 | 0.02 | 0.22 | 0.01 | 0.01                     | 0.04 | 0.17 | 0.34 | 0.41 | 0.30 | 0.44 | 0.26                                   |  |  |



Supplemental Table 5 continued

| Location      | Relative internode shape |      |      |      |      |      | Color of the leaves |      |      | Type of auricle |      |      |      |      |      |      |      |      |
|---------------|--------------------------|------|------|------|------|------|---------------------|------|------|-----------------|------|------|------|------|------|------|------|------|
|               | 1                        | 2    | 3    | 4    | 5    | 6    | 1                   | 2    | 7    | 1               | 2    | 3    | 4    | 5    | 6    | 7    | 8    | 9    |
| Amhara        | 0.33                     | 0.16 | 0.04 | 0.11 | 0.00 | 0.37 | 0.32                | 0.55 | 0.13 | 0.12            | 0.26 | 0.01 | 0.03 | 0.05 | 0.00 | 0.01 | 0.30 | 0.21 |
| Benshangul G. | 0.13                     | 0.13 | 0.00 | 0.00 | 0.06 | 0.69 | 0.25                | 0.69 | 0.06 | 0.25            | 0.06 | 0.00 | 0.06 | 0.13 | 0.00 | 0.00 | 0.25 | 0.25 |
| Introduction  | 0.27                     | 0.10 | 0.13 | 0.07 | 0.20 | 0.23 | 0.23                | 0.57 | 0.20 | 0.10            | 0.17 | 0.00 | 0.10 | 0.03 | 0.00 | 0.03 | 0.30 | 0.27 |
| Oromia        | 0.31                     | 0.09 | 0.04 | 0.07 | 0.03 | 0.45 | 0.23                | 0.73 | 0.04 | 0.28            | 0.16 | 0.01 | 0.03 | 0.05 | 0.01 | 0.02 | 0.25 | 0.19 |
| SNNPR         | 0.26                     | 0.18 | 0.03 | 0.11 | 0.04 | 0.38 | 0.18                | 0.70 | 0.12 | 0.20            | 0.29 | 0.02 | 0.07 | 0.06 | 0.01 | 0.03 | 0.12 | 0.20 |
| Tigray        | 0.25                     | 0.17 | 0.13 | 0.00 | 0.00 | 0.46 | 0.21                | 0.71 | 0.08 | 0.29            | 0.13 | 0.00 | 0.08 | 0.13 | 0.00 | 0.04 | 0.21 | 0.13 |
| All           | 0.29                     | 0.14 | 0.05 | 0.08 | 0.04 | 0.40 | 0.23                | 0.67 | 0.10 | 0.21            | 0.21 | 0.01 | 0.05 | 0.06 | 0.01 | 0.02 | 0.22 | 0.20 |

| Location      | Relative shape of ligule |      |      |      |      |      |      |      |      |      | Presence or Absence of stalk corky cracks |      | Presence or absence of stalk corky Patches |  |
|---------------|--------------------------|------|------|------|------|------|------|------|------|------|-------------------------------------------|------|--------------------------------------------|--|
|               | 1                        | 2    | 3    | 4    | 5    | 6    | 7    | 8    | 11   | 1    | 2                                         | 1    | 2                                          |  |
| Amhara        | 0.03                     | 0.03 | 0.01 | 0.12 | 0.26 | 0.22 | 0.14 | 0.18 | 0.00 | 0.09 | 0.91                                      | 0.83 | 0.17                                       |  |
| Benshangul G. | 0.13                     | 0.00 | 0.00 | 0.00 | 0.38 | 0.00 | 0.19 | 0.31 | 0.00 | 0.13 | 0.88                                      | 1.00 | 0.00                                       |  |
| Introduction  | 0.03                     | 0.10 | 0.03 | 0.03 | 0.40 | 0.13 | 0.07 | 0.17 | 0.03 | 0.07 | 0.93                                      | 0.80 | 0.20                                       |  |
| Oromia        | 0.10                     | 0.07 | 0.02 | 0.07 | 0.26 | 0.25 | 0.04 | 0.18 | 0.02 | 0.13 | 0.87                                      | 0.76 | 0.24                                       |  |
| SNNPR         | 0.13                     | 0.02 | 0.04 | 0.09 | 0.19 | 0.21 | 0.09 | 0.20 | 0.04 | 0.11 | 0.89                                      | 0.86 | 0.14                                       |  |
| Tigray        | 0.08                     | 0.00 | 0.04 | 0.00 | 0.42 | 0.25 | 0.04 | 0.17 | 0.00 | 0.04 | 0.96                                      | 0.71 | 0.29                                       |  |
| All           | 0.09                     | 0.04 | 0.02 | 0.07 | 0.27 | 0.21 | 0.08 | 0.19 | 0.01 | 0.11 | 0.89                                      | 0.81 | 0.19                                       |  |

Supplemental Table 5 continued

| Location     | Presence or absence of stalk growth cracks |      | Presence or absence of bud groove |      | Color of the exposed rind |      |      |      |      |      |      |      |      |      |      |      |      |      |      |      |  |
|--------------|--------------------------------------------|------|-----------------------------------|------|---------------------------|------|------|------|------|------|------|------|------|------|------|------|------|------|------|------|--|
|              | 1                                          | 6    | 1                                 | 4    | 1                         | 2    | 3    | 4    | 5    | 6    | 8    | 10   | 11   | 12   | 13   | 14   | 15   | 16   | 17   |      |  |
|              | Amhara                                     | 0.83 | 0.17                              | 0.63 | 0.37                      | 0.00 | 0.04 | 0.00 | 0.18 | 0.04 | 0.01 | 0.01 | 0.07 | 0.03 | 0.00 | 0.21 | 0.09 | 0.05 | 0.22 | 0.04 |  |
| Benshangul G | 0.50                                       | 0.50 | 0.50                              | 0.50 | 0.06                      | 0.13 | 0.00 | 0.13 | 0.06 | 0.00 | 0.00 | 0.19 | 0.06 | 0.00 | 0.13 | 0.13 | 0.00 | 0.06 | 0.06 |      |  |
| Introduction | 0.70                                       | 0.30 | 0.2                               | 0.8  | 0.00                      | 0.20 | 0.00 | 0.20 | 0.23 | 0.03 | 0.00 | 0.03 | 0.07 | 0.07 | 0.00 | 0.07 | 0.07 | 0.03 | 0.00 |      |  |
| Oromia       | 0.85                                       | 0.15 | 0.53                              | 0.47 | 0.02                      | 0.06 | 0.01 | 0.08 | 0.04 | 0.00 | 0.01 | 0.20 | 0.14 | 0.00 | 0.08 | 0.10 | 0.01 | 0.25 | 0.00 |      |  |
| SNNPR        | 0.70                                       | 0.30 | 0.46                              | 0.54 | 0.04                      | 0.01 | 0.00 | 0.12 | 0.07 | 0.02 | 0.03 | 0.18 | 0.10 | 0.01 | 0.11 | 0.07 | 0.01 | 0.21 | 0.04 |      |  |
| Tigray       | 0.54                                       | 0.46 | 0.46                              | 0.54 | 0.00                      | 0.00 | 0.00 | 0.00 | 0.04 | 0.00 | 0.00 | 0.54 | 0.17 | 0.04 | 0.00 | 0.00 | 0.00 | 0.21 | 0.00 |      |  |
| All          | 0.75                                       | 0.25 | 0.50                              | 0.50 | 0.02                      | 0.05 | 0.00 | 0.12 | 0.07 | 0.01 | 0.01 | 0.17 | 0.10 | 0.01 | 0.11 | 0.08 | 0.02 | 0.20 | 0.02 |      |  |
